# Supplementary material for: Isothiocyanates are detected in human synovial fluid following broccoli consumption and can affect the tissues of the knee joint
Source: PubMed Central journal article supplement (PMC5469854; doi:10.1038/s41598-017-03629-5), 2017-06-13
Supplement: 41598_2017_3629_MOESM1_ESM.pdf [file 41598_2017_3629_MOESM1_ESM.pdf]

## SUPPLEMENTARY INFORMATION

Isothiocyanates are detected in human synovial fluid following broccoli consumption and can affect the tissues of the knee joint.

Dr. Rose Davidson Ph.D<sup>1</sup>, Miss Sarah Gardner BSc<sup>1</sup>, Dr. Orla Jupp Ph.D<sup>1</sup>, Mrs. Angela Bullough BSc<sup>2</sup>, Mrs. Sue Butters BSc<sup>2</sup>, Mrs. Laura Watts MSc<sup>2</sup>, Prof. Simon Donell MD<sup>2</sup>, Dr. Maria Traka Ph.D<sup>3</sup>, Dr. Shikha Saha Ph.D<sup>3</sup>, Prof. Richard Mithen Ph.D<sup>3</sup>, Dr. Mandy Peffers Ph.D<sup>4</sup>, Prof. Peter Clegg Ph.D<sup>4</sup>, Dr. Yongping Bao Ph.D<sup>5</sup>, Prof. Aedin Cassidy Ph.D<sup>5</sup>, Prof. Ian Clark Ph.D<sup>1\*</sup>.

<sup>1</sup>School of Biological Sciences, University of East Anglia, Norwich, UK. <sup>2</sup>Institute of Orthopaedics, Norfolk and Norwich University Hospital, Norwich, UK. <sup>3</sup>Institute of Food Research, Norwich, UK. <sup>4</sup>Department of Musculoskeletal Biology, Institute of Ageing and Chronic Disease, University of Liverpool, Liverpool, UK. <sup>5</sup>Norwich Medical School, University of East Anglia, Norwich, UK

**Corresponding author:** \*Ian M. Clark

## Supplementary file S1

## Davidson et al 2017

| Detector              | Reporter | Quencher        |
|-----------------------|----------|-----------------|
| 18S-Hs99999901_s1     | FAM      | Non Fluorescent |
| ADAMTS1-Hs00199608_m1 | FAM      | Non Fluorescent |
| BMP6-Hs01099594_m1    | FAM      | Non Fluorescent |
| BST2-Hs01561315_m1    | FAM      | Non Fluorescent |
| CCL5-Hs00982282_m1    | FAM      | Non Fluorescent |
| CCL8-Hs04187715_m1    | FAM      | Non Fluorescent |
| COL1A2-Hs01028969_m1  | FAM      | Non Fluorescent |
| COL4A1-Hs00266237_m1  | FAM      | Non Fluorescent |
| CXCL9-Hs00171065_m1   | FAM      | Non Fluorescent |
| CCL20-Hs01011368_m1   | FAM      | Non Fluorescent |
| CCL7-Hs00171147_m1    | FAM      | Non Fluorescent |
| CD274-Hs01125301_m1   | FAM      | Non Fluorescent |
| CPXM1-Hs00219709_m1   | FAM      | Non Fluorescent |
| GBP3-Hs00544385_m1    | FAM      | Non Fluorescent |
| GCLM-Hs00157694_m1    | FAM      | Non Fluorescent |
| IFI27-Hs01086370_m1   | FAM      | Non Fluorescent |
| IFI6-Hs00242571_m1    | FAM      | Non Fluorescent |
| IFI6-Hs01564159_m1    | FAM      | Non Fluorescent |
| IGFBP4-Hs01057900_m1  | FAM      | Non Fluorescent |
| IL1A-Hs00174092_m1    | FAM      | Non Fluorescent |
| IL1B-Hs01555410_m1    | FAM      | Non Fluorescent |
| LCN2-Hs01008571_m1    | FAM      | Non Fluorescent |
| MARCKS-Hs00158993_m1  | FAM      | Non Fluorescent |
| MMP3-Hs00968305_m1    | FAM      | Non Fluorescent |
| NQO1-Hs01045994_m1    | FAM      | Non Fluorescent |
| EMILIN1-Hs00915216_mH | FAM      | Non Fluorescent |
| FAIM3-Hs01056796_m1   | FAM      | Non Fluorescent |
| FCAMR-Hs01049677_m1   | FAM      | Non Fluorescent |
| GBP2-Hs00894837_m1    | FAM      | Non Fluorescent |
| HERC5-Hs01061812_m1   | FAM      | Non Fluorescent |
| HMOX1-Hs01110250_m1   | FAM      | Non Fluorescent |
| ICAM1-Hs00164932_m1   | FAM      | Non Fluorescent |
| IFI44L-Hs00915292_m1  | FAM      | Non Fluorescent |
| IFI44-Hs00951349_m1   | FAM      | Non Fluorescent |
| IFIT2-Hs00533665_m1   | FAM      | Non Fluorescent |
| IL15RA-Hs00542604_m1  | FAM      | Non Fluorescent |
| IL36G-Hs00219742_m1   | FAM      | Non Fluorescent |
| IL6-Hs00985639_m1     | FAM      | Non Fluorescent |
| IL8-Hs00174103_m1     | FAM      | Non Fluorescent |
| IRF1-Hs00971960_m1    | FAM      | Non Fluorescent |
| LRP8-Hs00902382_m1    | FAM      | Non Fluorescent |
| ME1-Hs00159110_m1     | FAM      | Non Fluorescent |
| MMP12-Hs00899662_m1   | FAM      | Non Fluorescent |
| MMP13-Hs00233992_m1   | FAM      | Non Fluorescent |

|                        |     |                 |
|------------------------|-----|-----------------|
| OASL-Hs00984387_m1     | FAM | Non Fluorescent |
| PARP14-Hs00981511_m1   | FAM | Non Fluorescent |
| PENK-Hs00175049_m1     | FAM | Non Fluorescent |
| PIM2-Hs00179139_m1     | FAM | Non Fluorescent |
| PIR-Hs01125822_m1      | FAM | Non Fluorescent |
| POPDC3-Hs01592415_m1   | FAM | Non Fluorescent |
| PTX3-Hs01073991_m1     | FAM | Non Fluorescent |
| SELE-Hs00950401_m1     | FAM | Non Fluorescent |
| SFRP1-Hs00610060_m1    | FAM | Non Fluorescent |
| SLC15A3-Hs00275455_m1  | FAM | Non Fluorescent |
| SLC40A1-Hs00205888_m1  | FAM | Non Fluorescent |
| TNFSF10-Hs00921974_m1  | FAM | Non Fluorescent |
| TRAF1-Hs01090169_m1    | FAM | Non Fluorescent |
| TXNRD1-Hs00917067_m1   | FAM | Non Fluorescent |
| UBD-Hs00197374_m1      | FAM | Non Fluorescent |
| UBE2L6-Hs01125548_m1   | FAM | Non Fluorescent |
| S100A4-Hs00243202_m1   | FAM | Non Fluorescent |
| TSG6-Hs01113602_m1     | FAM | Non Fluorescent |
| CXCL10-AJN1FLP         | FAM | Non Fluorescent |
| IRX3-AJKAK3C           | FAM | Non Fluorescent |
| TNFRSF4-AJ70MDM        | FAM | Non Fluorescent |
| TGFBI-Hs00932745_m1    | FAM | Non Fluorescent |
| COL5A1-Hs00609133_m1   | FAM | Non Fluorescent |
| THBS3-Hs00938498_m1    | FAM | Non Fluorescent |
| CTSD-Hs00157205_m1     | FAM | Non Fluorescent |
| FN1-Hs00415006_m1      | FAM | Non Fluorescent |
| PRG4-Hs00981633_m1     | FAM | Non Fluorescent |
| COMP-Hs00164359_m1     | FAM | Non Fluorescent |
| HSPG2-Hs00194179_m1    | FAM | Non Fluorescent |
| HABP2-Hs00188053_m1    | FAM | Non Fluorescent |
| A2M-Hs00929971_m1      | FAM | Non Fluorescent |
| LUM-Hs00929860_m1      | FAM | Non Fluorescent |
| THBS4-Hs00170261_m1    | FAM | Non Fluorescent |
| GPX3-Hs01078668_m1     | FAM | Non Fluorescent |
| SAA4-Hs00197854_m1     | FAM | Non Fluorescent |
| HAPLN1-Hs01091999_m1   | FAM | Non Fluorescent |
| SOD3-Hs00162090_m1     | FAM | Non Fluorescent |
| FMOD-Hs00157619_m1     | FAM | Non Fluorescent |
| TNFAIP6-Hs01113602_m1  | FAM | Non Fluorescent |
| COL6A1-Hs01095585_m1   | FAM | Non Fluorescent |
| OGN-Hs00247901_m1      | FAM | Non Fluorescent |
| ITIH3-Hs00158314_m1    | FAM | Non Fluorescent |
| HTRA1-Hs01016151_m1    | FAM | Non Fluorescent |
| SERPIND1-Hs00164821_m1 | FAM | Non Fluorescent |
| ITGBL1-Hs01557019_m1   | FAM | Non Fluorescent |
| ADIPOQ-Hs00977214_m1   | FAM | Non Fluorescent |
| MMP2-Hs01548727_m1     | FAM | Non Fluorescent |
| RPL13A-Hs01578912_m1   | FAM | Non Fluorescent |
| YWHAZ-Hs00237047_m1    | FAM | Non Fluorescent |
| GDF11-Hs00195156_m1    | FAM | Non Fluorescent |
| TNFSF11-Hs00243522_m1  | FAM | Non Fluorescent |

**Supplementary S1.** Assays for gene expression (shown) were supplied by Applied Biosystems and used to obtain custom Taqman Low Density Arrays. FAM, 6-carboxyfluorescein.

| Eligible                   |            | Not Eligible                      |            |
|----------------------------|------------|-----------------------------------|------------|
| Reason for Exclusion       | Number     | Reason for Exclusion              | Number     |
| Unable to contact          | 12         | Smoker                            | 14         |
| Unsuitable TKR date        | 34         | Rheumatoid Arthritis              | 10         |
| Decline-No reason given    | 10         | Inflammation/Infection            | 20         |
| Decline-Not interested     | 34         | Hormone Therapy/Steroids          | 12         |
| Decline-Time factors       | 8          | No freezer capacity               | 6          |
| Recruited                  | 40         | Doesn't like broccoli             | 28         |
| Not contacted-end of study | 5          | Unable to adhere to diet          | 12         |
|                            |            | Unprepared to adhere to diet      | 8          |
|                            |            | Already recruited                 | 6          |
|                            |            | Not for TKR                       | 6          |
|                            |            | Unwilling to comply with sampling | 1          |
| <b>Subtotal</b>            | <b>123</b> |                                   | <b>143</b> |
| <b>Total</b>               | <b>266</b> |                                   |            |

**Supplementary S2. Study Recruitment details.** In total 266 patients scheduled for total knee replacement were screened using the eligibility criteria (table 1). Eligible and non-eligible patients (numbers shown) were excluded from the study for the reasons given in the above table.

| Accession | Protein                                                     | Previous | Peptide sequence                 | Next | Abundance |         | FOLD   |          | P VALUE |
|-----------|-------------------------------------------------------------|----------|----------------------------------|------|-----------|---------|--------|----------|---------|
|           |                                                             |          |                                  |      | LOW       | HIGH    | CHANGE |          |         |
| P20908    | Collagen alpha-1(V) chain OS=Homo sapiens GN=COL5A1         | K        | GPQGPAGRDGLQVPLVLPAG             | P    | 0.382     | 0.051   | 0.132  | 5.59E-09 |         |
| P02452    | Collagen alpha-1(I) chain OS=Homo sapiens GN=COL1A1         | G        | EPGPTGLPPGGER                    | G    | 0.013     | 0.002   | 0.170  | 3.35E-08 |         |
| P20908    | Collagen alpha-1(V) chain OS=Homo sapiens GN=COL5A1         | K        | GEQDVGQPGPRVQVQPPG               | P    | 20.002    | 4.165   | 0.208  | 5.05E-08 |         |
| P20908    | Collagen alpha-1(V) chain OS=Homo sapiens GN=COL5A1         | L        | KGNEGPPPGPAGSPGER                | G    | 20.002    | 4.165   | 0.208  | 5.05E-08 |         |
| P02452    | Collagen alpha-1(I) chain OS=Homo sapiens GN=COL1A1         | N        | AGPPGPPGPAK                      | E    | 0.102     | 0.022   | 0.215  | 7.26E-08 |         |
| P02452    | Collagen alpha-1(I) chain OS=Homo sapiens GN=COL1A1         | G        | APGPSGARGER                      | G    | 0.006     | 0.002   | 0.249  | 1.59E-07 |         |
| P16112    | Aggrecan core protein OS=Homo sapiens GN=ACAN               | R        | LEQFTFQAL                        | E    | 0.378     | 0.081   | 0.214  | 1.22E-06 |         |
| P02452    | Collagen alpha-1(I) chain OS=Homo sapiens GN=COL1A1         | P        | GDRGEPGPPGAGFAGPPGADGQPGAK       | G    | 1.337     | 0.170   | 0.127  | 1.76E-06 |         |
| P20908    | Collagen alpha-1(V) chain OS=Homo sapiens GN=COL5A1         | G        | ITGKPGPK                         | G    | 0.106     | 0.019   | 0.178  | 2.44E-06 |         |
| P02452    | Collagen alpha-1(I) chain OS=Homo sapiens GN=COL1A1         | R        | GETGPAGPTG                       | V    | 0.136     | 0.024   | 0.176  | 3.37E-06 |         |
| P02452    | Collagen alpha-1(I) chain OS=Homo sapiens GN=COL1A1         | P        | GAPGQGFQGGPGEPEGASGPMGPRGPPGPPGK | N    | 1.002     | 0.097   | 0.096  | 7.09E-06 |         |
| P02461    | Collagen alpha-1(III) chain OS=Homo sapiens GN=COL3A1       | R        | NGDGPVGGPSPGSP                   | G    | 0.003     | 0.001   | 0.230  | 7.70E-06 |         |
| P02461    | Collagen alpha-1(III) chain OS=Homo sapiens GN=COL3A1       | T        | GPVGGPPGAGQPKD                   | G    | 0.612     | 0.138   | 0.226  | 7.94E-06 |         |
| P02452    | Collagen alpha-1(I) chain OS=Homo sapiens GN=COL1A1         | D        | AGAPGAPGSQAGPLQGMPPER            | G    | 0.018     | 0.005   | 0.266  | 1.31E-05 |         |
| P20908    | Collagen alpha-1(V) chain OS=Homo sapiens GN=COL5A1         | R        | AAVDYCEHYSPDCDTAVPTDTPSQSDPNP    | D    | 0.369     | 0.149   | 0.402  | 1.31E-05 |         |
| P02452    | Collagen alpha-1(I) chain OS=Homo sapiens GN=COL1A1         | R        | GVQGGPPGAGP                      | R    | 0.095     | 0.031   | 0.322  | 1.41E-05 |         |
| P02452    | Collagen alpha-1(I) chain OS=Homo sapiens GN=COL1A1         | R        | TGDAGVPPGG                       | P    | 0.300     | 0.094   | 0.312  | 2.08E-05 |         |
| P02461    | Collagen alpha-1(III) chain OS=Homo sapiens GN=COL3A1       | N        | DGARGSDGQGGPPGPTAGFPPSPGAK       | G    | 1.124     | 0.056   | 0.050  | 2.21E-05 |         |
| P02452    | Collagen alpha-1(I) chain OS=Homo sapiens GN=COL1A1         | G        | PPGPPGPAKE                       | G    | 0.145     | 0.054   | 0.372  | 3.37E-05 |         |
| P20908    | Collagen alpha-1(V) chain OS=Homo sapiens GN=COL5A1         | K        | TGPIGQGAPGKPPGD                  | L    | 2.213     | 0.843   | 0.381  | 6.02E-05 |         |
| P02461    | Collagen alpha-1(III) chain OS=Homo sapiens GN=COL3A1       | R        | GSPGQGVKGESGK                    | G    | 0.002     | 0.001   | 0.510  | 9.16E-05 |         |
| P02452    | Collagen alpha-1(I) chain OS=Homo sapiens GN=COL1A1         | D        | GPCGAEVPECECPVCP                 | D    | 0.117     | 0.023   | 0.198  | 9.25E-05 |         |
| P20908    | Collagen alpha-1(V) chain OS=Homo sapiens GN=COL5A1         | K        | GPLKPLGPMGADGPPHPGKEGPP          | G    | 2.564     | 0.300   | 0.012  | 1.09E-04 |         |
| P02461    | Collagen alpha-1(III) chain OS=Homo sapiens GN=COL3A1       | R        | PPGPPGPPG                        | A    | 4.018     | 1.104   | 0.275  | 1.13E-04 |         |
| P02461    | Collagen alpha-1(III) chain OS=Homo sapiens GN=COL3A1       | D        | GTSGHPGIPGPPGR                   | G    | 0.788     | 0.154   | 0.195  | 1.36E-04 |         |
| P20908    | Collagen alpha-1(V) chain OS=Homo sapiens GN=COL5A1         | P        | GKEGPPGK                         | G    | 5.071     | 0.330   | 0.065  | 1.36E-04 |         |
| P20908    | Collagen alpha-1(V) chain OS=Homo sapiens GN=COL5A1         | K        | GDKGEQPPGPTGQGGPIGQGPSADGEPGP    | R    | 4.256     | 0.690   | 0.162  | 1.45E-04 |         |
| P02452    | Collagen alpha-1(I) chain OS=Homo sapiens GN=COL1A1         | G        | VRGEPGPPGAGAAGPAGNPGADGPPGAK     | G    | 3.286     | 0.641   | 0.195  | 1.52E-04 |         |
| P02452    | Collagen alpha-1(I) chain OS=Homo sapiens GN=COL1A1         | K        | 0.464                            | G    | 0.464     | 0.235   | 0.506  | 1.53E-04 |         |
| P02452    | Collagen alpha-1(I) chain OS=Homo sapiens GN=COL1A1         | G        | APGIAGAPGPPGAPGSPQGGPPGPPGK      | G    | 0.430     | 0.047   | 0.109  | 1.56E-04 |         |
| P02452    | Collagen alpha-1(I) chain OS=Homo sapiens GN=COL1A1         | G        | PRGAPGPPGR                       | D    | 0.030     | 0.011   | 0.356  | 1.69E-04 |         |
| P20908    | Collagen alpha-1(V) chain OS=Homo sapiens GN=COL5A1         | K        | DLQLCHPFDGVEYVWD                 | N    | 10.558    | 3.056   | 0.289  | 2.01E-04 |         |
| P02461    | Collagen alpha-1(III) chain OS=Homo sapiens GN=COL3A1       | G        | PPGSPGPRGQVGMGPPGPK              | G    | 0.110     | 0.022   | 0.197  | 2.04E-04 |         |
| P02452    | Collagen alpha-1(I) chain OS=Homo sapiens GN=COL1A1         | R        | GVPPGPAVGPAG                     | K    | 0.281     | 0.122   | 0.432  | 2.06E-04 |         |
| P02461    | Collagen alpha-1(III) chain OS=Homo sapiens GN=COL3A1       | R        | GENGSPGAPGAPGHPGPPGVPGPAG        | K    | 12.392    | 4.575   | 0.369  | 2.07E-04 |         |
| P02452    | Collagen alpha-1(I) chain OS=Homo sapiens GN=COL1A1         | G        | SPGAPGPTGAR                      | G    | 0.085     | 0.031   | 0.366  | 2.17E-04 |         |
| P20908    | Collagen alpha-1(V) chain OS=Homo sapiens GN=COL5A1         | S        | PPGDPGPPGMPGPPGLKGDGSPK          | G    | 2.857     | 0.085   | 0.030  | 2.75E-04 |         |
| P02461    | Collagen alpha-1(III) chain OS=Homo sapiens GN=COL3A1       | P        | SPNSNGPPGPPGSPGPK                | D    | 0.005     | 0.002   | 0.326  | 3.09E-04 |         |
| P02461    | Collagen alpha-1(III) chain OS=Homo sapiens GN=COL3A1       | R        | GLPSPGNSNGPPGPPGSPGKDGPP         | G    | 0.016     | 0.002   | 0.101  | 3.32E-04 |         |
| P20908    | Collagen alpha-1(V) chain OS=Homo sapiens GN=COL5A1         | Q        | GLPLGAKGKTK                      | G    | 0.003     | 0.001   | 0.213  | 3.63E-04 |         |
| P02452    | Collagen alpha-1(I) chain OS=Homo sapiens GN=COL1A1         | D        | GSPGKDVGR                        | G    | 0.056     | 0.016   | 0.285  | 3.76E-04 |         |
| P20908    | Collagen alpha-1(V) chain OS=Homo sapiens GN=COL5A1         | I        | GPPGKGLKPLGLMPGADGPPHPGK         | E    | 89.489    | 8.247   | 0.092  | 4.79E-04 |         |
| P02452    | Collagen alpha-1(I) chain OS=Homo sapiens GN=COL1A1         | R        | GPSGLQPPGPPGSGEGPSGASGAPGPPGPPG  | A    | 0.486     | 0.030   | 0.061  | 5.44E-04 |         |
| P02452    | Collagen alpha-1(I) chain OS=Homo sapiens GN=COL1A1         | R        | TGDAGVPPGPPGPPG                  | P    | 0.036     | 0.008   | 0.229  | 5.55E-04 |         |
| P02461    | Collagen alpha-1(III) chain OS=Homo sapiens GN=COL3A1       | K        | SGDRGESGAPGAPGAPGPA              | G    | 5.699     | 1.794   | 0.315  | 5.68E-04 |         |
| P02452    | Collagen alpha-1(I) chain OS=Homo sapiens GN=COL1A1         | R        | GLTGPVPPGPA                      | G    | 0.001     | 0.000   | 0.531  | 6.32E-04 |         |
| P02461    | Collagen alpha-1(III) chain OS=Homo sapiens GN=COL3A1       | R        | GEPPGQGHAGAQQPPGP                | P    | 0.238     | 0.044   | 0.185  | 7.33E-04 |         |
| P02452    | Collagen alpha-1(I) chain OS=Homo sapiens GN=COL1A1         | K        | AGERGVPG                         | P    | 0.023     | 0.012   | 0.516  | 7.82E-04 |         |
| P02452    | Collagen alpha-1(I) chain OS=Homo sapiens GN=COL1A1         | P        | GPAGFAGPPGADGQPAKGEPPGADAK       | G    | 15.407    | 3.668   | 0.238  | 7.90E-04 |         |
| P02461    | Collagen alpha-1(III) chain OS=Homo sapiens GN=COL3A1       | K        | GAAGPPGPPGAAAGTGLQGMPPGERGLGS    | P    | 4.346     | 0.088   | 0.020  | 9.17E-04 |         |
| P02461    | Collagen alpha-1(III) chain OS=Homo sapiens GN=COL3A1       | K        | GEMGPAGI                         | P    | 0.259     | 0.077   | 0.299  | 9.49E-04 |         |
| P02461    | Collagen alpha-1(III) chain OS=Homo sapiens GN=COL3A1       | S        | PPGKGEMGPAGIPAGPLMGAR            | G    | 13.034    | 3.551   | 0.272  | 1.01E-03 |         |
| P20908    | Collagen alpha-1(V) chain OS=Homo sapiens GN=COL5A1         | P        | KGTGPIGQAGPKGPPDGLR              | G    | 0.527     | 0.167   | 0.317  | 1.02E-03 |         |
| P02452    | Collagen alpha-1(I) chain OS=Homo sapiens GN=COL1A1         | P        | GPVPPGPPGPPSPAGDFSLPQPPQEK       | A    | 0.084     | 0.012   | 0.146  | 1.17E-03 |         |
| P20908    | Collagen alpha-1(V) chain OS=Homo sapiens GN=COL5A1         | I        | TGSPGIPGPPGPPGPPGPKGAK           | G    | 2.553     | 0.184   | 0.072  | 1.17E-03 |         |
| P02452    | Collagen alpha-1(I) chain OS=Homo sapiens GN=COL1A1         | K        | GEPPGVVQGP                       | P    | 0.043     | 0.025   | 0.590  | 1.21E-03 |         |
| P20908    | Collagen alpha-1(V) chain OS=Homo sapiens GN=COL5A1         | K        | GSPGPPVFPDPPGPPGPPGADGQDPP       | G    | 0.012     | 0.005   | 0.389  | 1.44E-03 |         |
| P02461    | Collagen alpha-1(III) chain OS=Homo sapiens GN=COL3A1       | P        | GNSGAPQR                         | G    | 0.015     | 0.006   | 0.412  | 1.52E-03 |         |
| P02461    | Collagen alpha-1(III) chain OS=Homo sapiens GN=COL3A1       | P        | PGIKGAPVGFPPGPK                  | G    | 78.065    | 18.196  | 0.233  | 1.58E-03 |         |
| P20908    | Collagen alpha-1(V) chain OS=Homo sapiens GN=COL5A1         | P        | GEPPGRLGLPK                      | G    | 4.702     | 3.061   | 0.651  | 1.87E-03 |         |
| P20908    | Collagen alpha-1(V) chain OS=Homo sapiens GN=COL5A1         | R        | GPSGAPGADGPPGPPG                 | I    | 7.462     | 2.015   | 0.270  | 1.99E-03 |         |
| P02452    | Collagen alpha-1(I) chain OS=Homo sapiens GN=COL1A1         | G        | VPPGPAVGPAGK                     | D    | 0.163     | 0.058   | 0.354  | 2.01E-03 |         |
| P02452    | Collagen alpha-1(I) chain OS=Homo sapiens GN=COL1A1         | G        | PSNAGPPGPPGPAK                   | E    | 0.027     | 0.003   | 0.122  | 2.08E-03 |         |
| P02461    | Collagen alpha-1(III) chain OS=Homo sapiens GN=COL3A1       | P        | IGPPGPAQPGDK                     | G    | 0.632     | 0.214   | 0.338  | 2.27E-03 |         |
| P20908    | Collagen alpha-1(V) chain OS=Homo sapiens GN=COL5A1         | P        | TKGPPGK                          | G    | 2.610     | 0.891   | 0.341  | 2.38E-03 |         |
| P20908    | Collagen alpha-1(V) chain OS=Homo sapiens GN=COL5A1         | Q        | DAATGSYDKALR                     | F    | 1.141     | 0.724   | 0.635  | 2.44E-03 |         |
| P02452    | Collagen alpha-1(I) chain OS=Homo sapiens GN=COL1A1         | K        | GPADGERGSPGA                     | G    | 0.005     | 0.002   | 0.390  | 2.50E-03 |         |
| P02452    | Collagen alpha-1(I) chain OS=Homo sapiens GN=COL1A1         | P        | PPGMPGPPGAPGPPGEGSR              | E    | 0.078     | 0.021   | 0.271  | 3.00E-03 |         |
| P20908    | Collagen alpha-1(V) chain OS=Homo sapiens GN=COL5A1         | K        | GNSGDDGAPGPPGERGPPGQPT           | G    | 1.904     | 0.414   | 0.218  | 3.20E-03 |         |
| P02461    | Collagen alpha-1(III) chain OS=Homo sapiens GN=COL3A1       | G        | PAGPRPVGSPGPPGK                  | D    | 0.698     | 0.357   | 0.511  | 3.20E-03 |         |
| P20908    | Collagen alpha-1(V) chain OS=Homo sapiens GN=COL5A1         | P        | GVTGMDGQPGPK                     | G    | 0.408     | 0.153   | 0.375  | 3.29E-03 |         |
| P20908    | Collagen alpha-1(V) chain OS=Homo sapiens GN=COL5A1         | I        | QLQLGPPGPK                       | G    | 0.036     | 0.015   | 0.421  | 3.31E-03 |         |
| P02461    | Collagen alpha-1(III) chain OS=Homo sapiens GN=COL3A1       | G        | GGADGVGPK                        | D    | 0.075     | 0.031   | 0.416  | 3.38E-03 |         |
| P02452    | Collagen alpha-1(I) chain OS=Homo sapiens GN=COL1A1         | G        | APDRGEPGPPGAGFAGPPGADGQPGAK      | G    | 2.434     | 0.712   | 0.293  | 3.42E-03 |         |
| P02452    | Collagen alpha-1(I) chain OS=Homo sapiens GN=COL1A1         | K        | PRGRTGAPRGPVEVPPG                | P    | 0.005     | 0.002   | 0.449  | 3.73E-03 |         |
| P20908    | Collagen alpha-1(V) chain OS=Homo sapiens GN=COL5A1         | G        | PPGPAKEGAPGK                     | G    | 0.006     | 0.002   | 0.324  | 3.79E-03 |         |
| P20908    | Collagen alpha-1(V) chain OS=Homo sapiens GN=COL5A1         | G        | FPPGPPVGLQLGPPGPK                | G    | 2121.023  | 181.427 | 0.086  | 4.00E-03 |         |
| P02461    | Collagen alpha-1(III) chain OS=Homo sapiens GN=COL3A1       | R        | GLPSPGPIKGP                      | A    | 0.235     | 0.106   | 0.451  | 4.09E-03 |         |
| Q06828    | Fibromodulin OS=Homo sapiens GN=FMOD                        | R        | SAMPADAPL                        | C    | 0.476     | 0.282   | 0.592  | 4.47E-03 |         |
| P20908    | Collagen alpha-1(V) chain OS=Homo sapiens GN=COL5A1         | R        | GLLPGKPPGPPG                     | P    | 0.002     | 0.001   | 0.297  | 4.48E-03 |         |
| P16112    | Aggrecan core protein OS=Homo sapiens GN=ACAN               | Y        | PEAGFGASAAPEASR                  | E    | 0.002     | 0.000   | 0.173  | 4.80E-03 |         |
| P02452    | Collagen alpha-1(I) chain OS=Homo sapiens GN=COL1A1         | L        | GRYR                             | T    | 0.019     | 0.005   | 0.244  | 4.89E-03 |         |
| P20908    | Collagen alpha-1(V) chain OS=Homo sapiens GN=COL5A1         | K        | GSPGVPFPPGPPGPPG                 | A    | 0.001     | 0.000   | 0.417  | 4.90E-03 |         |
| P02452    | Collagen alpha-1(I) chain OS=Homo sapiens GN=COL1A1         | K        | GDAGAPGAPGSPGAPGLQGMPPGERGAA     | G    | 7.027     | 1.695   | 0.241  | 5.16E-03 |         |
| P02461    | Collagen alpha-1(III) chain OS=Homo sapiens GN=COL3A1       | S        | DGKPPGSPGSGRPPGPPGSPGR           | G    | 0.489     | 0.048   | 0.098  | 5.23E-03 |         |
| P20908    | Collagen alpha-1(V) chain OS=Homo sapiens GN=COL5A1         | E        | KGAPGK                           | G    | 0.554     | 0.110   | 0.198  | 5.53E-03 |         |
| P20908    | Collagen alpha-1(V) chain OS=Homo sapiens GN=COL5A1         | P        | APVGGPPGEDGDK                    | G    | 0.025     | 0.009   | 0.362  | 5.80E-03 |         |
| P49747    | Cartilage oligomeric matrix protein OS=Homo sapiens GN=COMP | T        | IPEDYETHQLR                      | Q    | 0.000     | 0.000   | 0.397  | 5.90E-03 |         |
| P20908    | Collagen alpha-1(V) chain OS=Homo sapiens GN=COL5A1         | D        | VQGMGPPGPPGPPR                   | G    | 0.052     | 0.016   | 0.307  | 5.94E-03 |         |
| P20908    | Collagen alpha-1(V) chain OS=Homo sapiens GN=COL5A1         | G        | LEGGPKTGPVGGQAGPKGPPDGLR         | G    | 0.001     | 0.000   | 0.244  | 6.00E-03 |         |
| P20908    | Collagen alpha-1(V) chain OS=Homo sapiens GN=COL5A1         | G        | RPGQGGPPGAPGKAPGK                | G    | 0.973     | 0.577   | 0.064  | 6.43E-03 |         |
| P02452    | Collagen alpha-1(I) chain OS=Homo sapiens GN=COL1A1         | R        | GRTGDAGVPVGGPPGPPGPPGPPGAGDFDF   | L    | 0.183     | 0.014   | 0.075  | 6.45E-03 |         |
| P02452    | Collagen alpha-1(I) chain OS=Homo sapiens GN=COL1A1         | P        | QPPQEKADHGG                      | Y    | 0.256     | 0.058   | 0.618  | 6.50E-03 |         |
| P02461    | Collagen alpha-1(III) chain OS=Homo sapiens GN=COL3A1       | G        | PPGSGGAPGPPGQVK                  | G    | 12.081    | 7.056   | 0.584  | 6.51E-03 |         |
| P20908    | Collagen alpha-1(V) chain OS=Homo sapiens GN=COL5A1         | R        | ITSWKNPNS                        | W    | 3.259     | 0.457   | 0.140  | 6.78E-03 |         |
| P20908    | Collagen alpha-1(V) chain OS=Homo sapiens GN=COL5A1         | G        | NPQAQLGPPGQAIPGPK                | G    | 29.634    | 2.149   | 0.073  | 6.87E-03 |         |
| P20908    | Collagen alpha-1(V) chain OS=Homo sapiens GN=COL5A1         | K        | PPGDDGPKGSPGPPVGG                | D    | 141.469   | 15.288  | 0.108  | 7.19E-03 |         |
| P20908    | Collagen alpha-1(V) chain OS=Homo sapiens GN=COL5A1         | G        | DSGPKGK                          | G    | 0.034     | 0.011   | 0.336  | 7.79E-03 |         |
| P20908    | Collagen alpha-1(V) chain OS=Homo sapiens GN=COL5A1         | P        | PKGTGPIGQAGPKGPPDGLR             | G    | 1.420     | 0.350   | 0.247  | 8.22E-03 |         |
| P02461    | Collagen alpha-1(III) chain OS=Homo sapiens GN=COL3A1       | G        | YQGPPEGQAGSPGPPGPPGPAIGSPGPAK    | D    | 0.396     | 0.150   | 0.379  | 8.29E-03 |         |
| P20908    | Collagen alpha-1(V) chain OS=Homo sapiens GN=COL5A1         | P        | IGPPGPPGPPGPPG                   | G    | 42.011    | 1.772   | 0.042  | 9.24E-03 |         |
| P02452    | Collagen alpha-1(I) chain OS=Homo sapiens GN=COL1A1         | P        | GPSNAGPPGPPGPAK                  | E    | 0.058     | 0.033   | 0.577  | 9.29E-03 |         |

|        |                                                             |   |                            |   |           |          |       |          |
|--------|-------------------------------------------------------------|---|----------------------------|---|-----------|----------|-------|----------|
| P02461 | Collagen alpha-1(III) chain OS=Homo sapiens GN=COL3A1       | P | PGPPGAIGSPGPAK             | D | 1.383     | 0.820    | 0.593 | 9.43E-03 |
| P02452 | Collagen alpha-1(I) chain OS=Homo sapiens GN=COL1A1         | P | AGERGSPGPAK                | G | 0.095     | 0.048    | 0.512 | 0.010    |
| P20908 | Collagen alpha-1(V) chain OS=Homo sapiens GN=COL5A1         | G | SPGPDGPPGPMGPPGLKGDGSGPK   | G | 135.593   | 17.215   | 0.127 | 0.011    |
| P20908 | Collagen alpha-1(V) chain OS=Homo sapiens GN=COL5A1         | G | SPGPDGPPGPMGPPGLK          | G | 70.744    | 6.498    | 0.092 | 0.011    |
| P02461 | Collagen alpha-1(III) chain OS=Homo sapiens GN=COL3A1       | R | GSESPGHQPPGPPGPA           | P | 0.093     | 0.035    | 0.375 | 0.011    |
| P02461 | Collagen alpha-1(III) chain OS=Homo sapiens GN=COL3A1       | R | GSDGQPPGPPGATGFFGS         | P | 0.046     | 0.017    | 0.375 | 0.011    |
| P20908 | Collagen alpha-1(V) chain OS=Homo sapiens GN=COL5A1         | G | EPGSPGPK                   | R | 31.168    | 21.112   | 0.677 | 0.011    |
| P02452 | Collagen alpha-1(I) chain OS=Homo sapiens GN=COL1A1         | R | GTEGPAGPAGPAGPAGVGP        | G | 0.004     | 0.001    | 0.164 | 0.012    |
| P20908 | Collagen alpha-1(V) chain OS=Homo sapiens GN=COL5A1         | G | PPGVGLGGLPSPGPK            | G | 5.948     | 0.226    | 0.038 | 0.012    |
| P20908 | Collagen alpha-1(V) chain OS=Homo sapiens GN=COL5A1         | A | GLEGGPK                    | T | 0.023     | 0.012    | 0.527 | 0.012    |
| P16112 | Aggrecan core protein OS=Homo sapiens GN=ACAN               | G | IAEVSGESSR                 | A | 0.004     | 0.002    | 0.541 | 0.013    |
| P20908 | Collagen alpha-1(V) chain OS=Homo sapiens GN=COL5A1         | P | GRPGQPPGPPGAGEKAPGPK       | G | 4.903     | 0.506    | 0.103 | 0.013    |
| P20908 | Collagen alpha-1(V) chain OS=Homo sapiens GN=COL5A1         | P | NGPQGTGPPGPPGPPGPK         | D | 4.903     | 0.506    | 0.103 | 0.013    |
| P20908 | Collagen alpha-1(V) chain OS=Homo sapiens GN=COL5A1         | G | LGGLGPPGPK                 | G | 1.690     | 0.834    | 0.493 | 0.013    |
| P49747 | Cartilage oligomeric matrix protein OS=Homo sapiens GN=COMP | G | VPDTACVLLTAAAL             | G | 4.734     | 2.264    | 0.478 | 0.014    |
| P02452 | Collagen alpha-1(I) chain OS=Homo sapiens GN=COL1A1         | P | GSPGEQSPGASGAPRPPGASAGAPK  | D | 0.030     | 0.016    | 0.550 | 0.014    |
| P02452 | Collagen alpha-1(I) chain OS=Homo sapiens GN=COL1A1         | S | GPPGPPGPAK                 | E | 0.643     | 0.384    | 0.598 | 0.014    |
| P02452 | Collagen alpha-1(I) chain OS=Homo sapiens GN=COL1A1         | G | ARGPAGPQGR                 | G | 0.148     | 0.076    | 0.512 | 0.014    |
| P20908 | Collagen alpha-1(V) chain OS=Homo sapiens GN=COL5A1         | K | GSIGFPPGPAK                | E | 0.147     | 0.076    | 0.513 | 0.014    |
| P20908 | Collagen alpha-1(V) chain OS=Homo sapiens GN=COL5A1         | P | EELTPTTEAAPMPTSETGAGK      | E | 0.500     | 0.071    | 0.142 | 0.016    |
| P02461 | Collagen alpha-1(III) chain OS=Homo sapiens GN=COL3A1       | R | GPTGPIGPPGAGOP             | G | 0.311     | 0.184    | 0.591 | 0.016    |
| P20908 | Collagen alpha-1(V) chain OS=Homo sapiens GN=COL5A1         | G | PTGEPGSPGPK                | R | 1.761     | 0.422    | 0.240 | 0.016    |
| P20908 | Collagen alpha-1(V) chain OS=Homo sapiens GN=COL5A1         | E | GPPGPPGAPGSPGR             | G | 23.383    | 3.460    | 0.148 | 0.016    |
| P02452 | Collagen alpha-1(I) chain OS=Homo sapiens GN=COL1A1         | E | TTGVEGPK                   | G | 0.007     | 0.004    | 0.552 | 0.016    |
| P20908 | Collagen alpha-1(V) chain OS=Homo sapiens GN=COL5A1         | G | PQGAIGPPGPK                | G | 1.185     | 0.666    | 0.562 | 0.016    |
| P02452 | Collagen alpha-1(I) chain OS=Homo sapiens GN=COL1A1         | G | LPGERGRGAPGAPGAR           | G | 0.229     | 0.048    | 0.210 | 0.017    |
| P20908 | Collagen alpha-1(V) chain OS=Homo sapiens GN=COL5A1         | P | AGAAGPIGIRGPPGPPGPAK       | G | 5.529     | 0.258    | 0.077 | 0.017    |
| P02461 | Collagen alpha-1(III) chain OS=Homo sapiens GN=COL3A1       | K | GAAGPPGPAAGTGLQGM          | G | 0.335     | 0.152    | 0.454 | 0.017    |
| P49747 | Cartilage oligomeric matrix protein OS=Homo sapiens GN=COMP | D | TTMRGGR                    | L | 0.002     | 0.001    | 0.266 | 0.018    |
| P02461 | Collagen alpha-1(III) chain OS=Homo sapiens GN=COL3A1       | Q | GPQPKGDPGPPGIPGR           | N | 0.017     | 0.006    | 0.347 | 0.018    |
| P02461 | Collagen alpha-1(III) chain OS=Homo sapiens GN=COL3A1       | K | GDPGPPGIRGNQDPIGQPGSPG     | S | 2.284     | 0.664    | 0.290 | 0.018    |
| P02461 | Collagen alpha-1(III) chain OS=Homo sapiens GN=COL3A1       | G | PQPKGDPGPPGIPGR            | N | 1833.521  | 601.482  | 0.328 | 0.018    |
| P20908 | Collagen alpha-1(V) chain OS=Homo sapiens GN=COL5A1         | R | DSFKVYCNFTAGGSTCV          | F | 0.003     | 0.001    | 0.377 | 0.018    |
| P02461 | Collagen alpha-1(III) chain OS=Homo sapiens GN=COL3A1       | G | APLKGENLPLGNGAPGMGR        | G | 5.175     | 0.876    | 0.169 | 0.019    |
| P02461 | Collagen alpha-1(III) chain OS=Homo sapiens GN=COL3A1       | E | NGSPGAPGAPHPGPPGPAK        | S | 0.005     | 0.002    | 0.517 | 0.019    |
| P02461 | Collagen alpha-1(III) chain OS=Homo sapiens GN=COL3A1       | P | GYQGPGEQAGSPGPPGPAIGSPGPAK | D | 0.003     | 0.002    | 0.483 | 0.020    |
| P02452 | Collagen alpha-1(I) chain OS=Homo sapiens GN=COL1A1         | K | GAAGEPGKAG                 | E | 0.072     | 0.036    | 0.495 | 0.022    |
| P20908 | Collagen alpha-1(V) chain OS=Homo sapiens GN=COL5A1         | D | GPAGPPGPPGPPGPPGPPGPK      | G | 90.685    | 6.319    | 0.070 | 0.022    |
| P20908 | Collagen alpha-1(V) chain OS=Homo sapiens GN=COL5A1         | G | PAGRDGLQGVLPAGPVPPEGDDGK   | G | 0.097     | 0.030    | 0.308 | 0.023    |
| P02452 | Collagen alpha-1(I) chain OS=Homo sapiens GN=COL1A1         | R | GRTGDAGVPPGPPGPPGPK        | P | 0.091     | 0.029    | 0.324 | 0.025    |
| P20908 | Collagen alpha-1(V) chain OS=Homo sapiens GN=COL5A1         | P | GVDGQGPGRVQGPAGPKGR        | R | 19998.200 | 3588.280 | 0.179 | 0.025    |
| P02461 | Collagen alpha-1(III) chain OS=Homo sapiens GN=COL3A1       | N | GSPGAPGAPHPGPPGPPGPAK      | S | 1.094     | 0.549    | 0.502 | 0.027    |
| P20908 | Collagen alpha-1(V) chain OS=Homo sapiens GN=COL5A1         | V | PLGLVYPR                   | Q | 0.135     | 0.096    | 0.710 | 0.027    |
| P20908 | Collagen alpha-1(V) chain OS=Homo sapiens GN=COL5A1         | P | GSPGPPGPPGPPGPPGPK         | G | 0.037     | 0.011    | 0.291 | 0.027    |
| P02452 | Collagen alpha-1(I) chain OS=Homo sapiens GN=COL1A1         | G | PPGPPGSPGQSPGASGAPGR       | G | 0.094     | 0.058    | 0.621 | 0.028    |
| P20908 | Collagen alpha-1(V) chain OS=Homo sapiens GN=COL5A1         | H | PGPPGPPGPPGPPGPPGPK        | T | 79.784    | 7.546    | 0.095 | 0.028    |
| P49747 | Cartilage oligomeric matrix protein OS=Homo sapiens GN=COMP | R | AFQTVLDPEG                 | D | 8.553     | 4.512    | 0.528 | 0.029    |
| P07585 | Decorin OS=Homo sapiens GN=DCN                              | K | LTRVPGGLA                  | E | 72.798    | 13.453   | 0.185 | 0.029    |
| P20908 | Collagen alpha-1(V) chain OS=Homo sapiens GN=COL5A1         | L | EGPPGKTPGIPQAGPKGPPGDLR    | L | 13.412    | 7.597    | 0.566 | 0.030    |
| P20908 | Collagen alpha-1(V) chain OS=Homo sapiens GN=COL5A1         | K | GEPALIEPMLEGGPPGPAK        | L | 488.968   | 60.581   | 0.124 | 0.031    |
| P02461 | Collagen alpha-1(III) chain OS=Homo sapiens GN=COL3A1       | P | RGPTGPIGPPGAGQDGDK         | G | 1.865     | 0.784    | 0.421 | 0.033    |
| P02452 | Collagen alpha-1(I) chain OS=Homo sapiens GN=COL1A1         | G | ASPMGPRGPPGPPGPK           | N | 0.100     | 0.035    | 0.348 | 0.034    |
| P49747 | Cartilage oligomeric matrix protein OS=Homo sapiens GN=COMP | T | IPEDYETHLQRQA              |   | 0.002     | 0.001    | 0.584 | 0.034    |
| P02452 | Collagen alpha-1(I) chain OS=Homo sapiens GN=COL1A1         | A | GEPGKAGER                  | G | 0.001     | 0.000    | 0.467 | 0.035    |
| P02452 | Collagen alpha-1(I) chain OS=Homo sapiens GN=COL1A1         | K | GEPGDAGAKDAGPPGAPGAPG      | P | 1.584     | 0.926    | 0.585 | 0.035    |
| P02461 | Collagen alpha-1(III) chain OS=Homo sapiens GN=COL3A1       | A | GIPGPPMK                   | G | 0.010     | 0.005    | 0.460 | 0.036    |
| P20908 | Collagen alpha-1(V) chain OS=Homo sapiens GN=COL5A1         | R | GTEFGQKTPGPPGPK            | G | 0.027     | 0.015    | 0.555 | 0.036    |
| P02461 | Collagen alpha-1(III) chain OS=Homo sapiens GN=COL3A1       | P | GVGPAKGEDDK                | D | 121.284   | 30.868   | 0.255 | 0.038    |
| P02461 | Collagen alpha-1(III) chain OS=Homo sapiens GN=COL3A1       | G | MPGPRGSPGQGVK              | G | 1.052     | 0.350    | 0.333 | 0.038    |
| P20908 | Collagen alpha-1(V) chain OS=Homo sapiens GN=COL5A1         | P | PLGPPGPK                   | G | 5.099     | 2.369    | 0.465 | 0.040    |
| P02461 | Collagen alpha-1(III) chain OS=Homo sapiens GN=COL3A1       | K | GDPGPPGIRGNQDPIGQPGSPG     | S | 0.004     | 0.001    | 0.266 | 0.040    |
| P20908 | Collagen alpha-1(V) chain OS=Homo sapiens GN=COL5A1         | G | LFQKQDGEDPR                | G | 0.025     | 0.015    | 0.608 | 0.041    |
| P20908 | Collagen alpha-1(V) chain OS=Homo sapiens GN=COL5A1         | K | GPPGPPGPPGPPGPPGPPGPK      | N | 3.006     | 1.864    | 0.620 | 0.043    |
| P02452 | Collagen alpha-1(I) chain OS=Homo sapiens GN=COL1A1         | T | GPAGRPEVEGPPGPPGPAK        | G | 0.179     | 0.110    | 0.617 | 0.044    |
| P02461 | Collagen alpha-1(III) chain OS=Homo sapiens GN=COL3A1       | G | MPGPRGSPGQGVK              | G | 0.002     | 0.001    | 0.408 | 0.046    |
| P20908 | Collagen alpha-1(V) chain OS=Homo sapiens GN=COL5A1         | A | IGPPGKGLGKPLGMPGADGPPGHPGK | E | 24.686    | 7.024    | 0.285 | 0.046    |
| P20908 | Collagen alpha-1(V) chain OS=Homo sapiens GN=COL5A1         | K | GKQKEPALIE                 | G | 0.581     | 0.433    | 0.746 | 0.047    |
| P20908 | Collagen alpha-1(V) chain OS=Homo sapiens GN=COL5A1         | P | GKTGPIGQAGPKGPPGDLR        | G | 0.348     | 0.092    | 0.266 | 0.047    |
| P02461 | Collagen alpha-1(III) chain OS=Homo sapiens GN=COL3A1       | R | GSPGPPGAGFPFARGPLGPP       | G | 0.173     | 0.095    | 0.548 | 0.047    |
| P02452 | Collagen alpha-1(I) chain OS=Homo sapiens GN=COL1A1         | R | GLTGPPIGPPGAGAPGDKGESGSPGA | G | 3.461     | 1.471    | 0.425 | 0.048    |
| P02452 | Collagen alpha-1(I) chain OS=Homo sapiens GN=COL1A1         | R | VPGPPGSGNAGPPGPPGPAK       | G | 1.068     | 0.336    | 0.314 | 0.048    |
| P20908 | Collagen alpha-1(V) chain OS=Homo sapiens GN=COL5A1         | K | GKLGVPGLP                  | G | 0.241     | 0.021    | 0.086 | 0.048    |
| P02461 | Collagen alpha-1(III) chain OS=Homo sapiens GN=COL3A1       | G | LPGIAGPRGSPGER             | G | 0.137     | 0.079    | 0.578 | 0.049    |
| P02452 | Collagen alpha-1(I) chain OS=Homo sapiens GN=COL1A1         | K | GNSGEPGAP                  | G | 0.598     | 0.407    | 0.681 | 0.049    |
| P02452 | Collagen alpha-1(I) chain OS=Homo sapiens GN=COL1A1         | L | LRFFGER                    | G | 0.024     | 0.017    | 0.686 | 0.049    |
| P02461 | Collagen alpha-1(III) chain OS=Homo sapiens GN=COL3A1       | Q | GPQPKGDPGPPGIPGR           | N | 113.223   | 25.338   | 0.224 | 0.050    |
| P20908 | Collagen alpha-1(V) chain OS=Homo sapiens GN=COL5A1         | K | EPTSKPK                    | V | 0.330     | 0.238    | 0.721 | 0.052    |
| P20908 | Collagen alpha-1(V) chain OS=Homo sapiens GN=COL5A1         | G | PSGAAGPPGPK                | G | 0.066     | 0.036    | 0.686 | 0.053    |
| P20908 | Collagen alpha-1(V) chain OS=Homo sapiens GN=COL5A1         | R | GPSGAPGADGPPGPPGPPGPPGPK   | A | 4.566     | 0.906    | 0.199 | 0.053    |
| P02452 | Collagen alpha-1(I) chain OS=Homo sapiens GN=COL1A1         | G | AAGRVPGPPGPPGPPGPPGPAK     | E | 0.146     | 0.051    | 0.348 | 0.054    |
| P20908 | Collagen alpha-1(V) chain OS=Homo sapiens GN=COL5A1         | G | ADGPPGPPGPPGPPGPPGPK       | G | 0.001     | 0.001    | 0.557 | 0.055    |
| P02452 | Collagen alpha-1(I) chain OS=Homo sapiens GN=COL1A1         | R | GEPGPPGPPGPPGPPGPAK        | Q | 0.149     | 0.099    | 0.666 | 0.055    |
| P49747 | Cartilage oligomeric matrix protein OS=Homo sapiens GN=COMP | V | GLFAKANK                   | Q | 66.099    | 14.851   | 0.225 | 0.056    |
| P02461 | Collagen alpha-1(III) chain OS=Homo sapiens GN=COL3A1       | P | GVSGPK                     | G | 0.009     | 0.005    | 0.576 | 0.056    |
| P07585 | Decorin OS=Homo sapiens GN=DCN                              | I | QLGNKY                     | I | 0.288     | 0.159    | 0.553 | 0.057    |
| P20908 | Collagen alpha-1(V) chain OS=Homo sapiens GN=COL5A1         | L | PGEPPGPPGPK                | G | 0.975     | 0.104    | 0.106 | 0.058    |
| P20908 | Collagen alpha-1(V) chain OS=Homo sapiens GN=COL5A1         | K | GPPGDDGPKGSPGVGFG          | D | 8.001     | 4.632    | 0.579 | 0.059    |
| P20908 | Collagen alpha-1(V) chain OS=Homo sapiens GN=COL5A1         | G | DPGPPGPPGPPGDDGGR          | G | 0.174     | 0.062    | 0.354 | 0.060    |
| P20908 | Collagen alpha-1(V) chain OS=Homo sapiens GN=COL5A1         | K | GEPALIEPMLEGGPPGPAK        | P | 46.766    | 12.718   | 0.272 | 0.061    |
| P02452 | Collagen alpha-1(I) chain OS=Homo sapiens GN=COL1A1         | R | DGIPGQPLGPPGPPGPPGPK       | G | 62.483    | 5.116    | 0.082 | 0.063    |
| Q06828 | Fibromodulin OS=Homo sapiens GN=FMOD                        | L | DLSYNLQK                   | I | 0.555     | 0.415    | 0.748 | 0.068    |
| P20908 | Collagen alpha-1(V) chain OS=Homo sapiens GN=COL5A1         | K | PPGDDGPKGSPGVGPPGPPGPK     | G | 5.740     | 1.115    | 0.194 | 0.069    |
| P02461 | Collagen alpha-1(III) chain OS=Homo sapiens GN=COL3A1       | D | QASGNVK                    | K | 0.851     | 0.496    | 0.583 | 0.069    |
| P20908 | Collagen alpha-1(V) chain OS=Homo sapiens GN=COL5A1         | V | PGPKGAK                    | G | 0.102     | 0.030    | 0.295 | 0.070    |
| P02461 | Collagen alpha-1(III) chain OS=Homo sapiens GN=COL3A1       | Q | GESRGPDPGPPGPPGPK          | G | 3.908     | 2.770    | 0.709 | 0.072    |
| P02452 | Collagen alpha-1(I) chain OS=Homo sapiens GN=COL1A1         | A | PPGPPGPPGPPGPPGPPGPPGPK    | A | 0.096     | 0.063    | 0.655 | 0.073    |
| P02452 | Collagen alpha-1(I) chain OS=Homo sapiens GN=COL1A1         | K | GEPGDAGAKDAGPPGPAK         | P | 0.022     | 0.011    | 0.486 | 0.074    |
| P49747 | Cartilage oligomeric matrix protein OS=Homo sapiens GN=COMP | R | AFQTVLDPEGDAQIDP           | N | 1.158     | 0.696    | 0.601 | 0.075    |
| P02452 | Collagen alpha-1(I) chain OS=Homo sapiens GN=COL1A1         | G | PQGGPPGPPGPK               | G | 0.021     | 0.012    | 0.591 | 0.075    |
| P02452 | Collagen alpha-1(I) chain OS=Homo sapiens GN=COL1A1         | G | FQGGPPGPPGPPGPPGPPGPK      | G | 0.002     | 0.001    | 0.397 | 0.075    |
| P02452 | Collagen alpha-1(I) chain OS=Homo sapiens GN=COL1A1         | D | QQTGNLK                    | K | 0.008     | 0.002    | 0.279 | 0.075    |
| P20908 | Collagen alpha-1(V) chain OS=Homo sapiens GN=COL5A1         | K | EGPPGKGGGPPGPPGPPGPK       | P | 0.141     | 0.073    | 0.520 | 0.076    |
| P02452 | Collagen alpha-1(I) chain OS=Homo sapiens GN=COL1A1         | P | GAEALGPAK                  | G | 0.079     | 0.055    | 0.700 | 0.076    |
| P20908 | Collagen alpha-1(V) chain OS=Homo sapiens GN=COL5A1         | G | PSGPIGPPGPPGPPGPPGPK       | G | 0.018     | 0.002    | 0.126 | 0.077    |
| P02461 | Collagen alpha-1(III) chain OS=Homo sapiens GN=COL3A1       | K | GEGGPPGPPGPPGPPGPPGPK      | A | 0.008     | 0.004    | 0.556 | 0.077    |
| P16112 | Aggrecan core protein OS=Homo sapiens GN=ACAN               | Q | TGYDPSSR                   | Y | 0.004     | 0.001    | 0.289 | 0.078    |
| P07585 | Decorin OS=Homo sapiens GN=DCN                              | K | VPKLPP                     | D | 20.495    | 4.776    | 0.233 | 0.078    |



|        |                                                             |   |                                        |   |         |         |       |       |
|--------|-------------------------------------------------------------|---|----------------------------------------|---|---------|---------|-------|-------|
| P20908 | Collagen alpha-1(V) chain OS=Homo sapiens GN=COL5A1         | V | VGPQGP                                 | G | 0.008   | 0.004   | 0.530 | 0.216 |
| P16112 | Aggrecan core protein OS=Homo sapiens GN=ACAN               | K | DSSPVRTY                               | V | 0.000   | 0.000   | 0.464 | 0.217 |
| P02461 | Collagen alpha-1(III) chain OS=Homo sapiens GN=COL3A1       | R | GPVPSGPP                               | G | 0.015   | 0.009   | 0.571 | 0.218 |
| P02452 | Collagen alpha-1(I) chain OS=Homo sapiens GN=COL1A1         | R | GQAGVMVGFPGKA                          | A | 0.344   | 0.260   | 0.754 | 0.220 |
| P20908 | Collagen alpha-1(V) chain OS=Homo sapiens GN=COL5A1         | G | PQGGPGGPNPAGVGEKGEPEAGEPLGEGGPPGPK     | G | 40.003  | 15.172  | 0.379 | 0.222 |
| P02452 | Collagen alpha-1(I) chain OS=Homo sapiens GN=COL1A1         | R | GAPDRGEGPPGPAFGAPGPA                   | D | 0.013   | 0.010   | 0.759 | 0.222 |
| P20908 | Collagen alpha-1(V) chain OS=Homo sapiens GN=COL5A1         | G | PAGVPPGDEDDGK                          | G | 10.526  | 6.079   | 0.577 | 0.222 |
| P20908 | Collagen alpha-1(V) chain OS=Homo sapiens GN=COL5A1         | K | GDRGLPGQ                               | G | 0.000   | 0.000   | 0.190 | 0.223 |
| P02452 | Collagen alpha-1(I) chain OS=Homo sapiens GN=COL1A1         | K | GADGAPGKGEPSGPEENGAPGQ                 | M | 6.358   | 1.007   | 0.158 | 0.224 |
| P02452 | Collagen alpha-1(I) chain OS=Homo sapiens GN=COL1A1         | S | PGSPGDDK                               | T | 0.007   | 0.002   | 0.257 | 0.225 |
| P02461 | Collagen alpha-1(III) chain OS=Homo sapiens GN=COL3A1       | R | GLAGPPGM                               | P | 0.007   | 0.002   | 0.369 | 0.225 |
| P02452 | Collagen alpha-1(I) chain OS=Homo sapiens GN=COL1A1         | P | PGPPGAGKEGGK                           | G | 0.791   | 0.627   | 0.794 | 0.226 |
| P02461 | Collagen alpha-1(III) chain OS=Homo sapiens GN=COL3A1       | K | LMGSEGEFFKAEN                          | S | 400.817 | 303.134 | 0.756 | 0.228 |
| P02452 | Collagen alpha-1(I) chain OS=Homo sapiens GN=COL1A1         | K | GEPSPGSENGAPGQMG                       | R | 0.008   | 0.005   | 0.662 | 0.228 |
| P02452 | Collagen alpha-1(I) chain OS=Homo sapiens GN=COL1A1         | P | PGPGAPGQFGQPPGPEPEASGPMGR              | G | 1.699   | 0.978   | 0.576 | 0.229 |
| P02461 | Collagen alpha-1(III) chain OS=Homo sapiens GN=COL3A1       | P | PGPPQGL                                | Q | 0.003   | 0.001   | 0.349 | 0.231 |
| P02461 | Collagen alpha-1(III) chain OS=Homo sapiens GN=COL3A1       | K | GSPGAQGGPA                             | P | 0.052   | 0.028   | 0.544 | 0.234 |
| P02452 | Collagen alpha-1(I) chain OS=Homo sapiens GN=COL1A1         | P | TQPSVAQKNWYSK                          | N | 0.004   | 0.002   | 0.494 | 0.236 |
| P02452 | Collagen alpha-1(I) chain OS=Homo sapiens GN=COL1A1         | G | AEVPEGECCVPCDSESSTQDQETTGVGEGPKGDTGPR  | G | 23.321  | 3.351   | 0.144 | 0.238 |
| P02461 | Collagen alpha-1(III) chain OS=Homo sapiens GN=COL3A1       | R | PGPNPGAPGS                             | P | 0.279   | 0.175   | 0.627 | 0.239 |
| P02461 | Collagen alpha-1(III) chain OS=Homo sapiens GN=COL3A1       | P | GEPGANGPAAAGER                         | G | 0.001   | 0.001   | 0.818 | 0.243 |
| P20908 | Collagen alpha-1(V) chain OS=Homo sapiens GN=COL5A1         | K | GPQGPAGRDGLQVPLGPPAGPVGP               | P | 57.336  | 2.884   | 0.050 | 0.244 |
| P02461 | Collagen alpha-1(III) chain OS=Homo sapiens GN=COL3A1       | A | PGPPGEGK                               | G | 0.176   | 0.057   | 0.324 | 0.248 |
| P02452 | Collagen alpha-1(I) chain OS=Homo sapiens GN=COL1A1         | R | GRPGAPGAPG                             | A | 0.000   | 0.000   | 0.171 | 0.250 |
| P02452 | Collagen alpha-1(I) chain OS=Homo sapiens GN=COL1A1         | G | LPPIGPPGPR                             | G | 0.457   | 0.140   | 0.308 | 0.252 |
| P02461 | Collagen alpha-1(III) chain OS=Homo sapiens GN=COL3A1       | R | GLPGPPSGNPNPPGSPGSGKDGPPGAPG           | N | 1.049   | 0.692   | 0.660 | 0.255 |
| P02461 | Collagen alpha-1(III) chain OS=Homo sapiens GN=COL3A1       | R | GEPGQGHAGAQGPPGPGI                     | N | 0.009   | 0.006   | 0.682 | 0.255 |
| P02461 | Collagen alpha-1(III) chain OS=Homo sapiens GN=COL3A1       | N | DGARGSDGQPPGPPGATAGFSPGSAK             | G | 0.066   | 0.043   | 0.645 | 0.255 |
| P16112 | Aggrecan core protein OS=Homo sapiens GN=ACAN               | P | FTCKK                                  | G | 0.055   | 0.016   | 0.286 | 0.261 |
| P02452 | Collagen alpha-1(I) chain OS=Homo sapiens GN=COL1A1         | K | GADGPPGAPGAGPPGPIGV                    | G | 0.066   | 0.004   | 0.063 | 0.262 |
| P20908 | Collagen alpha-1(V) chain OS=Homo sapiens GN=COL5A1         | G | PPGQGLPLAGK                            | E | 0.013   | 0.009   | 0.684 | 0.263 |
| P20908 | Collagen alpha-1(V) chain OS=Homo sapiens GN=COL5A1         | K | ARSLRRPAP                              | L | 2.086   | 0.166   | 0.079 | 0.265 |
| P20908 | Collagen alpha-1(V) chain OS=Homo sapiens GN=COL5A1         | K | GNEGPPPPGPPAGSPGERGPAGAAGPIGIPGRPGQGGP | G | 54.489  | 29.195  | 0.536 | 0.266 |
| P02452 | Collagen alpha-1(I) chain OS=Homo sapiens GN=COL1A1         | K | GADGPPGAPGA                            | G | 0.050   | 0.003   | 0.064 | 0.270 |
| P02452 | Collagen alpha-1(I) chain OS=Homo sapiens GN=COL1A1         | S | YVDEKSTGSIIVPMGMSPGSR                  | G | 0.019   | 0.003   | 0.173 | 0.271 |
| P20908 | Collagen alpha-1(V) chain OS=Homo sapiens GN=COL5A1         | R | GQGGPPGPA                              | G | 0.018   | 0.006   | 0.350 | 0.272 |
| P20908 | Collagen alpha-1(V) chain OS=Homo sapiens GN=COL5A1         | K | GPDPGPPGPPVTGMDG                       | Q | 0.000   | 0.000   | 0.167 | 0.275 |
| P02461 | Collagen alpha-1(III) chain OS=Homo sapiens GN=COL3A1       | K | GTEGAPLKGELNLPENGAPG                   | M | 0.119   | 0.091   | 0.766 | 0.275 |
| P02452 | Collagen alpha-1(I) chain OS=Homo sapiens GN=COL1A1         | K | GEPGVPVQGG                             | P | 0.002   | 0.001   | 0.513 | 0.277 |
| P02452 | Collagen alpha-1(I) chain OS=Homo sapiens GN=COL1A1         | G | PAGNPADGQPGAK                          | G | 0.004   | 0.002   | 0.628 | 0.278 |
| P20908 | Collagen alpha-1(V) chain OS=Homo sapiens GN=COL5A1         | E | KGAPGK                                 | G | 0.831   | 0.552   | 0.664 | 0.279 |
| P02461 | Collagen alpha-1(III) chain OS=Homo sapiens GN=COL3A1       | K | GEVGPAGSPGS                            | N | 0.001   | 0.000   | 0.422 | 0.281 |
| P20908 | Collagen alpha-1(V) chain OS=Homo sapiens GN=COL5A1         | P | PGPPGAPGSPGER                          | G | 2.733   | 2.278   | 0.834 | 0.282 |
| P02452 | Collagen alpha-1(I) chain OS=Homo sapiens GN=COL1A1         | G | ADGSPGKDGVR                            | G | 0.000   | 0.000   | 0.427 | 0.282 |
| P02461 | Collagen alpha-1(III) chain OS=Homo sapiens GN=COL3A1       | G | PPGSPGSPGK                             | D | 0.000   | 0.000   | 0.195 | 0.282 |
| P02461 | Collagen alpha-1(III) chain OS=Homo sapiens GN=COL3A1       | G | PPGKNGETGPPGPPGTGPGGDK                 | G | 0.385   | 0.245   | 0.635 | 0.283 |
| P02461 | Collagen alpha-1(III) chain OS=Homo sapiens GN=COL3A1       | G | APGQGGPR                               | G | 0.000   | 0.000   | 0.641 | 0.285 |
| P02452 | Collagen alpha-1(I) chain OS=Homo sapiens GN=COL1A1         | S | VQGGPPG                                | P | 0.006   | 0.004   | 0.742 | 0.285 |
| P02452 | Collagen alpha-1(I) chain OS=Homo sapiens GN=COL1A1         | P | PGSPGEGGSPGASGAPGRGPPGSGAGAPGK         | D | 0.042   | 0.001   | 0.020 | 0.286 |
| P02461 | Collagen alpha-1(III) chain OS=Homo sapiens GN=COL3A1       | M | GRPGAPGER                              | G | 0.671   | 0.137   | 0.205 | 0.291 |
| P02461 | Collagen alpha-1(III) chain OS=Homo sapiens GN=COL3A1       | R | GAPAGPNIGP                             | E | 0.002   | 0.001   | 0.403 | 0.292 |
| P02461 | Collagen alpha-1(III) chain OS=Homo sapiens GN=COL3A1       | G | PKGDAGAPGAPGK                          | G | 0.830   | 0.031   | 0.037 | 0.293 |
| P02452 | Collagen alpha-1(I) chain OS=Homo sapiens GN=COL1A1         | D | DGEAGKPRGPRGPPGQGAR                    | G | 0.581   | 0.067   | 0.116 | 0.296 |
| P02452 | Collagen alpha-1(I) chain OS=Homo sapiens GN=COL1A1         | A | DGVAGKPGPAGER                          | G | 0.008   | 0.007   | 0.794 | 0.297 |
| P02452 | Collagen alpha-1(I) chain OS=Homo sapiens GN=COL1A1         | P | KDGTGPR                                | G | 0.016   | 0.010   | 0.623 | 0.297 |
| P02452 | Collagen alpha-1(I) chain OS=Homo sapiens GN=COL1A1         | G | ASGPAGPR                               | G | 0.001   | 0.000   | 0.144 | 0.297 |
| P20908 | Collagen alpha-1(V) chain OS=Homo sapiens GN=COL5A1         | P | PGSPGPKR                               | G | 0.460   | 0.322   | 0.700 | 0.297 |
| P02452 | Collagen alpha-1(I) chain OS=Homo sapiens GN=COL1A1         | G | EPGSPGSENGAPGMGRPLGGER                 | G | 0.115   | 0.064   | 0.556 | 0.298 |
| P49747 | Cartilage oligomeric matrix protein OS=Homo sapiens GN=COMP | R | VPNSDQKSD                              | G | 1.890   | 0.751   | 0.397 | 0.298 |
| P02452 | Collagen alpha-1(I) chain OS=Homo sapiens GN=COL1A1         | R | PGPPGMPGPPGLAGPPG                      | E | 0.086   | 0.005   | 0.063 | 0.299 |
| P02452 | Collagen alpha-1(I) chain OS=Homo sapiens GN=COL1A1         | A | PGVPVQGG                               | S | 0.001   | 0.000   | 0.441 | 0.300 |
| P20908 | Collagen alpha-1(V) chain OS=Homo sapiens GN=COL5A1         | L | QGLGPPGK                               | G | 0.000   | 0.000   | 0.727 | 0.302 |
| P02452 | Collagen alpha-1(I) chain OS=Homo sapiens GN=COL1A1         | G | PPGPMGPPGLAGPPGSEGR                    | E | 0.268   | 0.021   | 0.078 | 0.302 |
| P02452 | Collagen alpha-1(I) chain OS=Homo sapiens GN=COL1A1         | G | PPGPMGPPGLAGPPGSEGR                    | E | 0.102   | 0.010   | 0.099 | 0.303 |
| P02461 | Collagen alpha-1(III) chain OS=Homo sapiens GN=COL3A1       | P | PGQGGPPGK                              | D | 0.003   | 0.001   | 0.482 | 0.304 |
| P16112 | Aggrecan core protein OS=Homo sapiens GN=ACAN               | E | TSAYPEAGFGASAAPEASR                    | E | 0.024   | 0.002   | 0.069 | 0.307 |
| P02461 | Collagen alpha-1(III) chain OS=Homo sapiens GN=COL3A1       | A | PGVPVQGG                               | S | 0.000   | 0.000   | 0.472 | 0.308 |
| P02452 | Collagen alpha-1(I) chain OS=Homo sapiens GN=COL1A1         | G | PVGVQGGPPGAGEGKR                       | G | 0.070   | 0.051   | 0.731 | 0.309 |
| Q06828 | Fibromodulin OS=Homo sapiens GN=FMOD                        | R | HLRLRY                                 | L | 0.181   | 0.074   | 0.408 | 0.309 |
| P20908 | Collagen alpha-1(V) chain OS=Homo sapiens GN=COL5A1         | Q | RGPTGPR                                | G | 0.000   | 0.000   | 0.322 | 0.309 |
| P20908 | Collagen alpha-1(V) chain OS=Homo sapiens GN=COL5A1         | K | GSPGVPVGFDPGPPGEPGAPGQGGP              | G | 0.729   | 0.421   | 0.577 | 0.312 |
| P20908 | Collagen alpha-1(V) chain OS=Homo sapiens GN=COL5A1         | G | PTPQGGPIGPGGSPGADGEGPR                 | G | 1.757   | 0.647   | 0.368 | 0.315 |
| P20908 | Collagen alpha-1(V) chain OS=Homo sapiens GN=COL5A1         | K | LLSVDAENPVGVMQGT                       | F | 15.885  | 5.984   | 0.377 | 0.315 |
| P16112 | Aggrecan core protein OS=Homo sapiens GN=ACAN               | E | VSGESSR                                | A | 0.000   | 0.000   | 0.552 | 0.316 |
| P20908 | Collagen alpha-1(V) chain OS=Homo sapiens GN=COL5A1         | T | SSPSEIGPMANQDTIYEGIGPR                 | G | 53.432  | 5.002   | 0.094 | 0.318 |
| P20908 | Collagen alpha-1(V) chain OS=Homo sapiens GN=COL5A1         | G | PKGPPGPPGK                             | D | 241.596 | 149.194 | 0.618 | 0.319 |
| P20908 | Collagen alpha-1(V) chain OS=Homo sapiens GN=COL5A1         | A | PGPPGPR                                | G | 0.021   | 0.014   | 0.661 | 0.324 |
| P20908 | Collagen alpha-1(V) chain OS=Homo sapiens GN=COL5A1         | K | GEQGITGSPGPIG                          | P | 0.093   | 0.068   | 0.732 | 0.325 |
| P02461 | Collagen alpha-1(III) chain OS=Homo sapiens GN=COL3A1       | P | PGSPGPR                                | G | 0.000   | 0.000   | 0.432 | 0.326 |
| P20908 | Collagen alpha-1(V) chain OS=Homo sapiens GN=COL5A1         | G | SPGDPGPPGMPGPPGLKGDSPK                 | G | 1.383   | 0.878   | 0.635 | 0.326 |
| P02452 | Collagen alpha-1(I) chain OS=Homo sapiens GN=COL1A1         | G | SRGPPGADGVAGPK                         | G | 0.022   | 0.015   | 0.694 | 0.328 |
| P02452 | Collagen alpha-1(I) chain OS=Homo sapiens GN=COL1A1         | G | DAGPAGKGEPSGPEENGAPGQMGPR              | G | 1.004   | 0.094   | 0.094 | 0.329 |
| P49747 | Cartilage oligomeric matrix protein OS=Homo sapiens GN=COMP | R | VRFFE                                  | G | 0.000   | 0.000   | 0.598 | 0.330 |
| P02452 | Collagen alpha-1(I) chain OS=Homo sapiens GN=COL1A1         | P | GEPGASGMPGRGPPGPPGK                    | N | 0.057   | 0.041   | 0.719 | 0.331 |
| P02461 | Collagen alpha-1(III) chain OS=Homo sapiens GN=COL3A1       | R | GLPGPPSGNPNPPGPPGSG                    | S | 0.374   | 0.272   | 0.728 | 0.331 |
| P20908 | Collagen alpha-1(V) chain OS=Homo sapiens GN=COL5A1         | L | PEKGGHR                                | G | 0.002   | 0.001   | 0.592 | 0.334 |
| P20908 | Collagen alpha-1(V) chain OS=Homo sapiens GN=COL5A1         | K | GNEGPPGPPGAPGSPG                       | E | 0.128   | 0.056   | 0.437 | 0.335 |
| P20908 | Collagen alpha-1(V) chain OS=Homo sapiens GN=COL5A1         | P | GEGGPPGPK                              | G | 0.014   | 0.001   | 0.047 | 0.336 |
| P02452 | Collagen alpha-1(I) chain OS=Homo sapiens GN=COL1A1         | K | GPRGETGP                               | A | 0.003   | 0.001   | 0.276 | 0.345 |
| P02461 | Collagen alpha-1(III) chain OS=Homo sapiens GN=COL3A1       | D | GNPSSDGLPGR                            | D | 0.158   | 0.132   | 0.836 | 0.347 |
| P20908 | Collagen alpha-1(V) chain OS=Homo sapiens GN=COL5A1         | P | GPKGPPGDDGPK                           | G | 0.013   | 0.010   | 0.746 | 0.349 |
| P02461 | Collagen alpha-1(III) chain OS=Homo sapiens GN=COL3A1       | G | APGLGIAGITAGRLAGPPGMPGR                | G | 0.018   | 0.014   | 0.774 | 0.351 |
| P02452 | Collagen alpha-1(I) chain OS=Homo sapiens GN=COL1A1         | G | PPGAPGQDGRGPPGPPGAR                    | G | 0.001   | 0.000   | 0.313 | 0.351 |
| P20908 | Collagen alpha-1(V) chain OS=Homo sapiens GN=COL5A1         | R | GGPRGRLPADGLPG                         | P | 0.019   | 0.014   | 0.740 | 0.351 |
| P20908 | Collagen alpha-1(V) chain OS=Homo sapiens GN=COL5A1         | P | GVVGPQGTGETGPMGERGHPGPPGPEEQGLPLGAK    | E | 0.007   | 0.005   | 0.747 | 0.352 |
| P20908 | Collagen alpha-1(V) chain OS=Homo sapiens GN=COL5A1         | I | ALSVHKK                                | N | 0.001   | 0.000   | 0.148 | 0.353 |
| P02452 | Collagen alpha-1(I) chain OS=Homo sapiens GN=COL1A1         | R | GPPGMPGPPGLAGPPGEGS                    | R | 0.086   | 0.020   | 0.232 | 0.356 |
| P20908 | Collagen alpha-1(V) chain OS=Homo sapiens GN=COL5A1         | P | GRPGQGGPPGAGEK                         | G | 0.174   | 0.141   | 0.813 | 0.362 |
| P16112 | Aggrecan core protein OS=Homo sapiens GN=ACAN               | R | TLVESVTAQP                             | T | 0.049   | 0.023   | 0.468 | 0.363 |
| P02461 | Collagen alpha-1(III) chain OS=Homo sapiens GN=COL3A1       | P | PGTTPGDDGK                             | G | 0.031   | 0.022   | 0.723 | 0.363 |
| P02461 | Collagen alpha-1(III) chain OS=Homo sapiens GN=COL3A1       | G | APGAPGR                                | G | 0.005   | 0.003   | 0.644 | 0.366 |
| P02452 | Collagen alpha-1(I) chain OS=Homo sapiens GN=COL1A1         | K | STGSIIVPMGMGPPGRLPGLP                  | P | 0.206   | 0.113   | 0.549 | 0.368 |
| P02461 | Collagen alpha-1(III) chain OS=Homo sapiens GN=COL3A1       | G | APGHPGPPGVPAGK                         | S | 13.587  | 7.834   | 0.577 | 0.369 |
| P20908 | Collagen alpha-1(V) chain OS=Homo sapiens GN=COL5A1         | R | GGPNDGPPGLPP                           | G | 0.032   | 0.023   | 0.737 | 0.371 |
| P02452 | Collagen alpha-1(I) chain OS=Homo sapiens GN=COL1A1         | P | PGSPGEGGSPGASGAPGR                     | G | 0.000   | 0.000   | 0.594 | 0.371 |
| P20908 | Collagen alpha-1(V) chain OS=Homo sapiens GN=COL5A1         | G | RPQGGPPGAGEKAPGK                       | G | 0.256   | 0.220   | 0.859 | 0.374 |
| P20908 | Collagen alpha-1(V) chain OS=Homo sapiens GN=COL5A1         | K | GEIPEPGQ                               | K | 0.000   | 0.000   | 0.424 | 0.375 |



|        |                                                             |   |                                          |   |         |         |       |       |
|--------|-------------------------------------------------------------|---|------------------------------------------|---|---------|---------|-------|-------|
| P20908 | Collagen alpha-1(V) chain OS=Homo sapiens GN=COL5A1         | K | GNEGPPPPGAGSPGERGAGAAPIGIP               | G | 1.055   | 0.107   | 0.102 | 0.377 |
| P02452 | Collagen alpha-1(I) chain OS=Homo sapiens GN=COL1A1         | T | GPAGPPGAPGAPGAPGVPAGKSGDR                | G | 0.015   | 0.005   | 0.310 | 0.380 |
| P02461 | Collagen alpha-1(III) chain OS=Homo sapiens GN=COL3A1       | P | GAPGLMGAR                                | G | 0.001   | 0.000   | 0.662 | 0.382 |
| P16112 | Aggrecan core protein OS=Homo sapiens GN=ACAN               | G | AGEISGLPSSLEDISGR                        | A | 0.068   | 0.040   | 0.586 | 0.384 |
| P20908 | Collagen alpha-1(V) chain OS=Homo sapiens GN=COL5A1         | D | GLNPPPTMLMLPRFRFGGGDAGSK                 | G | 3.886   | 2.168   | 0.558 | 0.387 |
| P02452 | Collagen alpha-1(I) chain OS=Homo sapiens GN=COL1A1         | P | SNAGPPGPPGPAK                            | E | 0.010   | 0.007   | 0.666 | 0.389 |
| P20908 | Collagen alpha-1(V) chain OS=Homo sapiens GN=COL5A1         | K | GEPGDVQPGPRGVQGP                         | P | 11.076  | 8.012   | 0.723 | 0.389 |
| P16112 | Aggrecan core protein OS=Homo sapiens GN=ACAN               | V | RYPIK                                    | A | 0.000   | 0.000   | 0.413 | 0.389 |
| P20908 | Collagen alpha-1(V) chain OS=Homo sapiens GN=COL5A1         | E | RGPPGPA                                  | G | 0.004   | 0.001   | 0.413 | 0.393 |
| P02452 | Collagen alpha-1(I) chain OS=Homo sapiens GN=COL1A1         | P | GGPPGPKNSGEPGAPGSK                       | G | 0.001   | 0.000   | 0.121 | 0.394 |
| P02461 | Collagen alpha-1(III) chain OS=Homo sapiens GN=COL3A1       | Q | GPPGAPGLGIAGITGARGLAGPPMPGPR             | G | 0.048   | 0.037   | 0.764 | 0.394 |
| P02461 | Collagen alpha-1(III) chain OS=Homo sapiens GN=COL3A1       | R | GAPGKGGGPPGVA                            | G | 1.070   | 0.567   | 0.530 | 0.395 |
| P02461 | Collagen alpha-1(III) chain OS=Homo sapiens GN=COL3A1       | G | PPGMPGPR                                 | G | 0.002   | 0.000   | 0.048 | 0.399 |
| P20908 | Collagen alpha-1(V) chain OS=Homo sapiens GN=COL5A1         | L | PAGEGHR                                  | G | 0.009   | 0.005   | 0.563 | 0.401 |
| P02452 | Collagen alpha-1(I) chain OS=Homo sapiens GN=COL1A1         | G | PAGPQGR                                  | G | 0.000   | 0.000   | 0.717 | 0.401 |
| P20908 | Collagen alpha-1(V) chain OS=Homo sapiens GN=COL5A1         | R | GFPGPPVGLQLPGEKGET                       | G | 5.307   | 4.256   | 0.802 | 0.403 |
| P20908 | Collagen alpha-1(V) chain OS=Homo sapiens GN=COL5A1         | L | RGFPDR                                   | G | 0.002   | 0.001   | 0.415 | 0.404 |
| P20908 | Collagen alpha-1(V) chain OS=Homo sapiens GN=COL5A1         | D | DGEPGQTGSPGTPGPGSPGPKR                   | G | 288.511 | 170.792 | 0.592 | 0.405 |
| P02452 | Collagen alpha-1(I) chain OS=Homo sapiens GN=COL1A1         | R | GFSGLQPPGPPGSPGEGPSGA                    | S | 0.011   | 0.006   | 0.605 | 0.406 |
| P20908 | Collagen alpha-1(V) chain OS=Homo sapiens GN=COL5A1         | P | GPPGPPGEGGLPLGAK                         | E | 0.036   | 0.024   | 0.672 | 0.410 |
| P20908 | Collagen alpha-1(V) chain OS=Homo sapiens GN=COL5A1         | R | GFPPGPPVGLQLPGEKGET                      | G | 1.341   | 1.092   | 0.814 | 0.411 |
| P02452 | Collagen alpha-1(I) chain OS=Homo sapiens GN=COL1A1         | G | PAGPTGPPVGVGARGPAGQGP                    | G | 0.001   | 0.000   | 0.766 | 0.418 |
| P20908 | Collagen alpha-1(V) chain OS=Homo sapiens GN=COL5A1         | Q | GLPQPPGK                                 | G | 0.002   | 0.001   | 0.629 | 0.419 |
| P02461 | Collagen alpha-1(III) chain OS=Homo sapiens GN=COL3A1       | K | GDAGAPGAPGK                              | D | 0.504   | 0.425   | 0.843 | 0.422 |
| P02452 | Collagen alpha-1(I) chain OS=Homo sapiens GN=COL1A1         | R | GPAGPPGRDIPGQPLPDPGPPGPPGPP              | G | 4.826   | 3.726   | 0.772 | 0.422 |
| P02452 | Collagen alpha-1(I) chain OS=Homo sapiens GN=COL1A1         | G | PRGANGAPGNDGAK                           | G | 0.077   | 0.058   | 0.759 | 0.424 |
| P20908 | Collagen alpha-1(V) chain OS=Homo sapiens GN=COL5A1         | G | PPGHPGK                                  | E | 0.052   | 0.035   | 0.666 | 0.426 |
| P02461 | Collagen alpha-1(III) chain OS=Homo sapiens GN=COL3A1       | L | KFCHEPK                                  | S | 0.987   | 0.772   | 0.783 | 0.426 |
| P20908 | Collagen alpha-1(V) chain OS=Homo sapiens GN=COL5A1         | D | DLQGPVGLPAGPVGPPGEGDGDK                  | G | 0.173   | 0.111   | 0.644 | 0.427 |
| P20908 | Collagen alpha-1(V) chain OS=Homo sapiens GN=COL5A1         | G | PPGLPDPGPKGAK                            | G | 0.138   | 0.102   | 0.745 | 0.429 |
| P20908 | Collagen alpha-1(V) chain OS=Homo sapiens GN=COL5A1         | K | GEPALIEPMGLIEGPPGEPAG                    | L | 15.328  | 10.755  | 0.702 | 0.432 |
| P20908 | Collagen alpha-1(V) chain OS=Homo sapiens GN=COL5A1         | K | GEAHPGPPGPPGPPGVEIQL                     | P | 6.141   | 3.999   | 0.651 | 0.437 |
| P20908 | Collagen alpha-1(V) chain OS=Homo sapiens GN=COL5A1         | P | GPAGKPR                                  | R | 0.004   | 0.002   | 0.643 | 0.444 |
| P02452 | Collagen alpha-1(I) chain OS=Homo sapiens GN=COL1A1         | R | DGIPGQPLPG                               | P | 0.001   | 0.000   | 0.743 | 0.444 |
| P20908 | Collagen alpha-1(V) chain OS=Homo sapiens GN=COL5A1         | R | GVQPPGAPG                                | P | 0.000   | 0.000   | 0.450 | 0.446 |
| P02461 | Collagen alpha-1(III) chain OS=Homo sapiens GN=COL3A1       | D | GVPKDGR                                  | G | 1.114   | 0.048   | 0.417 | 0.448 |
| P02461 | Collagen alpha-1(III) chain OS=Homo sapiens GN=COL3A1       | E | GKNGAK                                   | G | 0.006   | 0.002   | 0.410 | 0.449 |
| P20908 | Collagen alpha-1(V) chain OS=Homo sapiens GN=COL5A1         | K | GEQGITGSPGIPGPPG                         | G | 40.017  | 35.001  | 0.875 | 0.449 |
| P20908 | Collagen alpha-1(V) chain OS=Homo sapiens GN=COL5A1         | K | GEPGEAGEPLGPEGGPPGKGE                    | R | 337.154 | 229.672 | 0.681 | 0.451 |
| P02452 | Collagen alpha-1(I) chain OS=Homo sapiens GN=COL1A1         | P | PPGPPGAGKEGK                             | G | 0.021   | 0.018   | 0.874 | 0.451 |
| P20908 | Collagen alpha-1(V) chain OS=Homo sapiens GN=COL5A1         | G | PSGAAGPPGK                               | G | 1.262   | 1.033   | 0.819 | 0.454 |
| P02452 | Collagen alpha-1(I) chain OS=Homo sapiens GN=COL1A1         | P | GAPGPPGAPGK                              | S | 0.062   | 0.047   | 0.765 | 0.456 |
| P20908 | Collagen alpha-1(V) chain OS=Homo sapiens GN=COL5A1         | Q | GPTFPGK                                  | G | 0.006   | 0.004   | 0.654 | 0.457 |
| P20908 | Collagen alpha-1(V) chain OS=Homo sapiens GN=COL5A1         | V | GPPSGGLKGEFVDVPGQPR                      | G | 195.422 | 118.764 | 0.608 | 0.457 |
| P20908 | Collagen alpha-1(V) chain OS=Homo sapiens GN=COL5A1         | E | RGPPGAPG                                 | S | 0.006   | 0.004   | 0.719 | 0.460 |
| P20908 | Collagen alpha-1(V) chain OS=Homo sapiens GN=COL5A1         | K | GPPGPPGPPGVTGMDGQPGKNGVPGQ               | E | 0.001   | 0.001   | 0.752 | 0.463 |
| P02461 | Collagen alpha-1(III) chain OS=Homo sapiens GN=COL3A1       | K | GDAGAPGAPGK                              | D | 0.016   | 0.014   | 0.872 | 0.468 |
| P20908 | Collagen alpha-1(V) chain OS=Homo sapiens GN=COL5A1         | E | PGSPGPKR                                 | G | 0.001   | 0.001   | 0.810 | 0.470 |
| P02452 | Collagen alpha-1(I) chain OS=Homo sapiens GN=COL1A1         | D | PGGPPGPK                                 | G | 0.032   | 0.027   | 0.854 | 0.471 |
| P07585 | Decorin OS=Homo sapiens GN=DCN                              | N | KITEIK                                   | D | 0.024   | 0.008   | 0.348 | 0.473 |
| P02461 | Collagen alpha-1(III) chain OS=Homo sapiens GN=COL3A1       | S | PPGPKDGTSGHPGIPGPPGR                     | G | 189.850 | 126.610 | 0.667 | 0.474 |
| P02461 | Collagen alpha-1(III) chain OS=Homo sapiens GN=COL3A1       | R | GENGSPGAPGAPGHPGPPVGP                    | A | 0.035   | 0.027   | 0.779 | 0.476 |
| P02452 | Collagen alpha-1(I) chain OS=Homo sapiens GN=COL1A1         | K | GLTSPGSPG                                | P | 0.004   | 0.002   | 0.643 | 0.476 |
| P20908 | Collagen alpha-1(V) chain OS=Homo sapiens GN=COL5A1         | F | PGANGEK                                  | G | 0.003   | 0.002   | 0.765 | 0.476 |
| P02452 | Collagen alpha-1(I) chain OS=Homo sapiens GN=COL1A1         | R | GANGAPGNDGAKDAGAPGAPGQSGAP               | G | 0.322   | 0.263   | 0.818 | 0.478 |
| P02461 | Collagen alpha-1(III) chain OS=Homo sapiens GN=COL3A1       | G | PPGTPGDDK                                | G | 0.002   | 0.001   | 0.809 | 0.480 |
| P02461 | Collagen alpha-1(III) chain OS=Homo sapiens GN=COL3A1       | K | SGVAVGGLAGYPGAPGPPGPPGTPGSHGPPS          | G | 0.003   | 0.002   | 0.531 | 0.481 |
| P20908 | Collagen alpha-1(V) chain OS=Homo sapiens GN=COL5A1         | S | GAAGPPGK                                 | G | 0.032   | 0.021   | 0.637 | 0.483 |
| P07585 | Decorin OS=Homo sapiens GN=DCN                              | L | PEKMPK                                   | T | 0.050   | 0.032   | 0.640 | 0.484 |
| P02461 | Collagen alpha-1(III) chain OS=Homo sapiens GN=COL3A1       | E | KGEPGR                                   | G | 0.001   | 0.001   | 0.652 | 0.484 |
| P02452 | Collagen alpha-1(I) chain OS=Homo sapiens GN=COL1A1         | E | GPPGPPGAPGAPGADGQPGAK                    | G | 4.000   | 2.379   | 0.595 | 0.485 |
| P02452 | Collagen alpha-1(I) chain OS=Homo sapiens GN=COL1A1         | E | PGEPGASGMPGR                             | G | 0.002   | 0.001   | 0.472 | 0.491 |
| P20908 | Collagen alpha-1(V) chain OS=Homo sapiens GN=COL5A1         | A | QPADLLK                                  | V | 0.000   | 0.000   | 0.817 | 0.492 |
| P02452 | Collagen alpha-1(I) chain OS=Homo sapiens GN=COL1A1         | G | EPGPPGAPGAPGAPGADGQPGAKGANGAPGIAGAPGPFGR | G | 152.262 | 121.483 | 0.798 | 0.493 |
| P02452 | Collagen alpha-1(I) chain OS=Homo sapiens GN=COL1A1         | D | RGDAGPK                                  | G | 0.000   | 0.000   | 0.487 | 0.494 |
| P02461 | Collagen alpha-1(III) chain OS=Homo sapiens GN=COL3A1       | R | GAPGAPGAAAGEPG                           | R | 0.001   | 0.000   | 0.516 | 0.495 |
| P16112 | Aggrecan core protein OS=Homo sapiens GN=ACAN               | A | PLGPSATPTASGDR                           | T | 159.752 | 114.257 | 0.715 | 0.499 |
| P02452 | Collagen alpha-1(I) chain OS=Homo sapiens GN=COL1A1         | I | GNVNGAPGAK                               | G | 0.003   | 0.003   | 0.831 | 0.501 |
| P20908 | Collagen alpha-1(V) chain OS=Homo sapiens GN=COL5A1         | S | ILTTVKAK                                 | K | 0.002   | 0.001   | 0.415 | 0.501 |
| P02461 | Collagen alpha-1(III) chain OS=Homo sapiens GN=COL3A1       | K | GAAGPPGPPGAAAGTGLQG                      | M | 1.107   | 0.941   | 0.850 | 0.502 |
| P02461 | Collagen alpha-1(III) chain OS=Homo sapiens GN=COL3A1       | G | APGAPGSRGAPGQGR                          | G | 0.554   | 0.471   | 0.850 | 0.502 |
| P02461 | Collagen alpha-1(III) chain OS=Homo sapiens GN=COL3A1       | P | GAPGLMGAR                                | G | 2.755   | 2.269   | 0.824 | 0.504 |
| P20908 | Collagen alpha-1(V) chain OS=Homo sapiens GN=COL5A1         | R | DGLQGPVGLPAGPVGPPGEGDKGEIGE              | P | 0.725   | 0.602   | 0.830 | 0.504 |
| P20908 | Collagen alpha-1(V) chain OS=Homo sapiens GN=COL5A1         | G | APGKPPDGLR                               | G | 0.120   | 0.104   | 0.872 | 0.505 |
| P20908 | Collagen alpha-1(V) chain OS=Homo sapiens GN=COL5A1         | G | EIEGPGKSK                                | G | 0.376   | 0.313   | 0.832 | 0.505 |
| P02461 | Collagen alpha-1(III) chain OS=Homo sapiens GN=COL3A1       | G | SPGVSGPKDAGQPGK                          | G | 0.037   | 0.029   | 0.794 | 0.505 |
| P20908 | Collagen alpha-1(V) chain OS=Homo sapiens GN=COL5A1         | G | AQLLPGPQGAIGPPGK                         | G | 297.202 | 206.322 | 0.694 | 0.507 |
| P02461 | Collagen alpha-1(III) chain OS=Homo sapiens GN=COL3A1       | K | GDAGAPGAGK                               | D | 0.000   | 0.000   | 0.443 | 0.509 |
| P02461 | Collagen alpha-1(III) chain OS=Homo sapiens GN=COL3A1       | K | GEPGPGADGVGPKDGP                         | R | 1.624   | 1.306   | 0.804 | 0.509 |
| P02452 | Collagen alpha-1(I) chain OS=Homo sapiens GN=COL1A1         | L | GAPGPSGAR                                | G | 0.006   | 0.004   | 0.772 | 0.513 |
| P20908 | Collagen alpha-1(V) chain OS=Homo sapiens GN=COL5A1         | K | GGQPPGQGP                                | I | 15.394  | 12.723  | 0.827 | 0.514 |
| P02461 | Collagen alpha-1(III) chain OS=Homo sapiens GN=COL3A1       | K | GEMGPPGAPGAPGLMGARG                      | P | 0.485   | 0.426   | 0.877 | 0.517 |
| P49747 | Cartilage oligomeric matrix protein OS=Homo sapiens GN=COMP | G | VACIQTESGAR                              | C | 0.450   | 0.387   | 0.861 | 0.518 |
| P02461 | Collagen alpha-1(III) chain OS=Homo sapiens GN=COL3A1       | G | QPVMGFPKPKNDGAPGK                        | N | 0.001   | 0.001   | 0.865 | 0.520 |
| P02452 | Collagen alpha-1(I) chain OS=Homo sapiens GN=COL1A1         | P | GIAGAPGPPGARGPSGPPGPPGPPGPK              | G | 0.016   | 0.010   | 0.587 | 0.523 |
| P20908 | Collagen alpha-1(V) chain OS=Homo sapiens GN=COL5A1         | Q | GEPGPPGQGNPQAQGLPQGAIGPPGK               | G | 104.732 | 93.079  | 0.889 | 0.528 |
| P02452 | Collagen alpha-1(I) chain OS=Homo sapiens GN=COL1A1         | R | GEPGPTGLPFPGERGPP                        | G | 0.019   | 0.016   | 0.855 | 0.534 |
| P20908 | Collagen alpha-1(V) chain OS=Homo sapiens GN=COL5A1         | G | PSGAPGADGPPGPPGGINPVAUGEK                | G | 0.329   | 0.259   | 0.787 | 0.541 |



|        |                                                       |   |                                      |   |          |          |       |         |
|--------|-------------------------------------------------------|---|--------------------------------------|---|----------|----------|-------|---------|
| P20908 | Collagen alpha-1(V) chain OS=Homo sapiens GN=COL5A1   | K | GNEGPPGPPGAGSPGERGAGAAAGPIGPRGP      | P | 3.220    | 2.917    | 0.906 | 0.849   |
| P02461 | Collagen alpha-1(III) chain OS=Homo sapiens GN=COL3A1 | G | EPGANGLPGAAGER                       | G | 0.000    | 0.000    | 0.905 | 0.852   |
| P02461 | Collagen alpha-1(III) chain OS=Homo sapiens GN=COL3A1 | R | GPAGNGPIGEGK                         | P | 0.021    | 0.019    | 0.949 | 0.856   |
| P02461 | Collagen alpha-1(III) chain OS=Homo sapiens GN=COL3A1 | G | PPGPRGNR                             | G | 0.090    | 0.079    | 0.873 | 0.857   |
| P02461 | Collagen alpha-1(III) chain OS=Homo sapiens GN=COL3A1 | G | PGADGVPKGDGPR                        | G | 79.918   | 72.954   | 0.913 | 0.859   |
| P02461 | Collagen alpha-1(III) chain OS=Homo sapiens GN=COL3A1 | R | GSPGGPGAAGFPAGRLPGPPGNSGNPDPGPPSGSPG | K | 0.321    | 0.307    | 0.956 | 0.865   |
| P02461 | Collagen alpha-1(III) chain OS=Homo sapiens GN=COL3A1 | K | FCHPELKSGEYVVDPN                     | Q | 0.057    | 0.055    | 0.960 | 0.866   |
| P16112 | Aggrecan core protein OS=Homo sapiens GN=ACAN         | P | QSPPLR                               | V | 0.001    | 0.001    | 0.813 | 0.867   |
| P20908 | Collagen alpha-1(V) chain OS=Homo sapiens GN=COL5A1   | E | GIGGPRGK                             | G | 0.000    | 0.000    | 0.843 | 0.867   |
| P16112 | Aggrecan core protein OS=Homo sapiens GN=ACAN         | R | GISAVPSP                             | G | 0.005    | 0.005    | 0.914 | 0.869   |
| P02461 | Collagen alpha-1(III) chain OS=Homo sapiens GN=COL3A1 | T | SGHPGPIGPPGR                         | G | 0.042    | 0.040    | 0.946 | 0.870   |
| P02452 | Collagen alpha-1(I) chain OS=Homo sapiens GN=COL1A1   | R | GPPGSAGAPGKD                         | G | 0.039    | 0.038    | 0.975 | 0.871   |
| P02452 | Collagen alpha-1(I) chain OS=Homo sapiens GN=COL1A1   | K | GEPGPPGAG                            | E | 0.001    | 0.001    | 0.852 | 0.872   |
| P20908 | Collagen alpha-1(V) chain OS=Homo sapiens GN=COL5A1   | A | GEPGLPEGGPPGPK                       | G | 0.003    | 0.003    | 0.945 | 0.872   |
| P02461 | Collagen alpha-1(III) chain OS=Homo sapiens GN=COL3A1 | P | SGPRGQPGVMGFPPGK                     | G | 5.924    | 5.688    | 0.960 | 0.878   |
| P02461 | Collagen alpha-1(III) chain OS=Homo sapiens GN=COL3A1 | S | PGPMGPR                              | G | 0.001    | 0.001    | 0.891 | 0.880   |
| P20908 | Collagen alpha-1(V) chain OS=Homo sapiens GN=COL5A1   | L | SGPKGK                               | G | 0.001    | 0.001    | 0.956 | 0.894   |
| P02452 | Collagen alpha-1(I) chain OS=Homo sapiens GN=COL1A1   | A | GPPGAPGAPGAPVPGAGKSGDR               | G | 0.005    | 0.005    | 0.957 | 0.901   |
| P02461 | Collagen alpha-1(III) chain OS=Homo sapiens GN=COL3A1 | D | GVPKDGPR                             | G | 0.001    | 0.001    | 0.906 | 0.902   |
| P02461 | Collagen alpha-1(III) chain OS=Homo sapiens GN=COL3A1 | G | AGPPGDEGK                            | G | 0.004    | 0.004    | 0.976 | 0.903   |
| P02461 | Collagen alpha-1(III) chain OS=Homo sapiens GN=COL3A1 | K | GDTPPPQGLQLPGTGGPPGNGPKG             | E | 0.025    | 0.024    | 0.935 | 0.905   |
| P16112 | Aggrecan core protein OS=Homo sapiens GN=ACAN         | L | PSATPTASGDR                          | T | 6.327    | 5.888    | 0.931 | 0.906   |
| P20908 | Collagen alpha-1(V) chain OS=Homo sapiens GN=COL5A1   | G | TPGKPGPR                             | G | 0.000    | 0.000    | 0.947 | 0.912   |
| P02452 | Collagen alpha-1(I) chain OS=Homo sapiens GN=COL1A1   | P | PGPAGAAGPAGNPGADGQPGAK               | G | 0.158    | 0.152    | 0.962 | 0.912   |
| P02452 | Collagen alpha-1(I) chain OS=Homo sapiens GN=COL1A1   | R | GETGPAGPPGAPGAPGVPVPGAGKSG           | D | 0.072    | 0.071    | 0.979 | 0.926   |
| P02461 | Collagen alpha-1(III) chain OS=Homo sapiens GN=COL3A1 | P | PGAGPPLAIGITGARGLAGPPGMPPR           | G | 5.918    | 5.769    | 0.975 | 0.928   |
| P16112 | Aggrecan core protein OS=Homo sapiens GN=ACAN         | V | KDKDSSPVVR                           | T | 0.149    | 0.142    | 0.956 | 0.929   |
| P16112 | Aggrecan core protein OS=Homo sapiens GN=ACAN         | K | VSTAGDISGATPLVPGSVEVSSVSPESSETSA     | P | 0.584    | 0.574    | 0.984 | 0.937   |
| P02452 | Collagen alpha-1(I) chain OS=Homo sapiens GN=COL1A1   | K | DGEAGAQPAGPAGPAGERGEQG               | P | 0.008    | 0.008    | 0.986 | 0.941   |
| P20908 | Collagen alpha-1(V) chain OS=Homo sapiens GN=COL5A1   | L | QGPVGLPGPAGVPPGEDGDK                 | G | 3.713    | 3.666    | 0.987 | 0.944   |
| P20908 | Collagen alpha-1(V) chain OS=Homo sapiens GN=COL5A1   | A | IGPPGPR                              | G | 0.159    | 0.157    | 0.983 | 0.946   |
| P20908 | Collagen alpha-1(V) chain OS=Homo sapiens GN=COL5A1   | P | PGDDGPK                              | G | 0.001    | 0.001    | 0.936 | 0.949   |
| P02452 | Collagen alpha-1(I) chain OS=Homo sapiens GN=COL1A1   | S | GPMGPRGPPGPK                         | N | 0.006    | 0.006    | 0.968 | 0.951   |
| P02461 | Collagen alpha-1(III) chain OS=Homo sapiens GN=COL3A1 | A | IGPSGPAGK                            | D | 0.157    | 0.155    | 0.985 | 0.952   |
| P02461 | Collagen alpha-1(III) chain OS=Homo sapiens GN=COL3A1 | R | GSPGPGAAGFPAGRLPGPP                  | G | 0.077    | 0.076    | 0.986 | 0.957   |
| P20908 | Collagen alpha-1(V) chain OS=Homo sapiens GN=COL5A1   | K | QKQGEPAIIEPGML                       | I | 3533.836 | 3438.668 | 0.973 | 0.968   |
| P16112 | Aggrecan core protein OS=Homo sapiens GN=ACAN         | G | TPSSFPTVSLVDR                        | T | 0.002    | 0.002    | 0.991 | 0.971   |
| Q06828 | Fibromodulin OS=Homo sapiens GN=FMOD                  | Y | SLRELHL                              | S | 0.007    | 0.007    | 0.985 | 0.975   |
| P02452 | Collagen alpha-1(I) chain OS=Homo sapiens GN=COL1A1   | R | GETGPAGPPGAPGAPGAP                   | G | 0.465    | 0.462    | 0.992 | 0.979   |
| P02461 | Collagen alpha-1(III) chain OS=Homo sapiens GN=COL3A1 | P | PGMPGPR                              | G | 0.001    | 0.001    | 0.985 | 0.984   |
| P02461 | Collagen alpha-1(III) chain OS=Homo sapiens GN=COL3A1 | G | PIGPPGPR                             | G | 0.000    | 0.000    | 0.988 | 0.985   |
| P20908 | Collagen alpha-1(V) chain OS=Homo sapiens GN=COL5A1   | P | GPSGPPGKR                            | G | 0.002    | 0.002    | 0.988 | 0.986   |
| P02452 | Collagen alpha-1(I) chain OS=Homo sapiens GN=COL1A1   | K | VLCDVICDETCKNCPGAEVPEGECCPCPDGSE     | S | 0.151    | 0.150    | 0.998 | 0.994   |
| P02452 | Collagen alpha-1(I) chain OS=Homo sapiens GN=COL1A1   | R | GVGPPGAPGPRGANGAGPND                 | G | 0.004    | 0.004    | 0.996 | 0.994   |
| P02452 | Collagen alpha-1(I) chain OS=Homo sapiens GN=COL1A1   | E | PGPPGAGAAGPAGNPGADGQPGAK             | G | 0.000    | 0.000    | 0.994 | 0.995   |
| P02461 | Collagen alpha-1(III) chain OS=Homo sapiens GN=COL3A1 | R | GPPGAPAGANGAPLRGGAG                  | E | 0.062    | 0.062    | 0.999 | 0.998   |
| P20908 | Collagen alpha-1(V) chain OS=Homo sapiens GN=COL5A1   | P | KGPPGPPGK                            | D | 0.149    | 0.149    | 0.999 | 0.999   |
| P20908 | Collagen alpha-1(V) chain OS=Homo sapiens GN=COL5A1   | R | GFPGPPGVLQGLPGPPGKGET                | G | 19.209   | 19.196   | 0.999 | 0.999   |
| P02452 | Collagen alpha-1(I) chain OS=Homo sapiens GN=COL1A1   | R | FGSLQGGPPGPPGSGE                     | Q | 0.394    | 0.000    | 0.000 | #DIV/0! |
| P02452 | Collagen alpha-1(I) chain OS=Homo sapiens GN=COL1A1   | D | AGAPGAPGQAGPLQGMPPGER                | G | 1.925    | 0.002    | 0.001 | #DIV/0! |

**Supplementary S3. Neopeptides in synovial fluid.** Neopeptides were identified using tandem mass spectrometry for matrix components aggrecan, biglycan, decorin, fibromodulin, cartilage oligomatrix protein and collagens. Neopeptide abundance was measured in low and high glucosinolate groups and fold change calculated. Neopeptides with higher abundance in the low glucosinolate group are shown. Neopeptide sequences, corresponding protein and accession identifiers, abundance, fold change and p-values are shown (OS: organism species, GN: gene name), Low glucosinolate n=8, high glucosinolate n= 9.

| Gene symbol | Gene name                                                 | Cartilage   |         |                  | Fat         |         |                  |
|-------------|-----------------------------------------------------------|-------------|---------|------------------|-------------|---------|------------------|
|             |                                                           | Fold Change | p-value | Adjusted p-value | Fold Change | p-value | Adjusted p-value |
| A2M         | Alpha-2-Macroglobulin                                     | 1.12        | 0.523   | 0.983            | 0.85        | 0.276   | 0.9752           |
| ADAMTS1     | ADAM Metallopeptidase With Thrombospondin Type 1 Motif, 1 | 0.89        | 0.489   | 0.983            | 0.96        | 0.821   | 0.9911           |
| ADIPOQ      | Adiponectin, C1Q And Collagen Domain Containing           | 1.40        | 0.529   | 0.983            | 1.02        | 0.926   | 0.9911           |
| BMP6        | Bone Morphogenetic Protein 6                              | 0.87        | 0.255   | 0.983            | 0.88        | 0.625   | 0.9752           |
| BST2        | Bone Marrow Stromal Cell Antigen 2                        | 1.15        | 0.620   | 0.983            | 0.89        | 0.496   | 0.9752           |
| CCL20       | Chemokine (C-C Motif) Ligand 20                           | 1.39        | 0.540   | 0.983            | 0.27        | 0.114   | 0.9752           |
| CCL5        | Chemokine (C-C Motif) Ligand 5                            | 1.61        | 0.223   | 0.983            | 0.60        | 0.186   | 0.9752           |
| CCL7        | chemokine (C-C motif) ligand 7 (CCL7), mRNA.              | 0.36        | 0.059   | 0.9505           | 1.41        | 0.671   | 0.9752           |
| CCL8        | Chemokine (C-C Motif) Ligand 8                            | 1.71        | 0.286   | 0.983            | 0.80        | 0.561   | 0.9752           |
| CD274       | CD274 Molecule                                            | 1.14        | 0.646   | 0.983            | 1.02        | 0.936   | 0.9911           |
| COL1A2      | Collagen, Type I, Alpha 2                                 | 0.93        | 0.836   | 0.983            | 1.15        | 0.668   | 0.9752           |
| COL4A1      | Collagen, Type IV, Alpha 1                                | 1.22        | 0.643   | 0.983            | 1.13        | 0.669   | 0.9752           |
| COL5A1      | Collagen, Type V, Alpha 1                                 | 0.90        | 0.623   | 0.983            | 1.43        | 0.221   | 0.9752           |
| COL6A1      | Collagen, Type VI, Alpha 1                                | 0.94        | 0.783   | 0.9981           | 1.33        | 0.231   | 0.9752           |
| COMP        | Cartilage Oligomeric Matrix Protein                       | 0.97        | 0.820   | 0.9981           | 1.17        | 0.668   | 0.9752           |
| CPXM1       | Carboxypeptidase X (M14 Family), Member 1                 | 1.89        | 0.512   | 0.983            | 2.06        | 0.445   | 0.9752           |
| CTSD        | Cathepsin D                                               | 0.93        | 0.522   | 0.983            | 0.82        | 0.494   | 0.9752           |
| CXCL10      | Chemokine (C-X-C Motif) Ligand 10                         | 1.16        | 0.802   | 0.9981           | 0.33        | 0.030   | 0.9752           |
| CXCL9       | Chemokine (C-X-C Motif) Ligand 9                          | 1.44        | 0.584   | 0.983            | 0.77        | 0.489   | 0.9752           |
| EMILIN1     | Elastin Microfibril Interfacer 1                          | 0.81        | 0.210   | 0.983            | 1.24        | 0.473   | 0.9752           |
| FAIM3       | Fas Apoptotic Inhibitory Molecule 3                       | 1.35        | 0.533   | 0.983            | 0.41        | 0.164   | 0.9752           |
| FCAMR       | Fc Receptor, IgA, IgM, High Affinity                      | 1.41        | 0.687   | 0.9831           | 3.31        | 0.353   | 0.9752           |
| FMOD        | Fibromodulin                                              | 1.01        | 0.964   | 0.9981           | 1.09        | 0.583   | 0.9752           |
| FN1         | Fibronectin 1                                             | 1.16        | 0.294   | 0.983            | 0.75        | 0.666   | 0.9752           |
| GBP2        | Guanylate Binding Protein 2, Interferon-Inducible         | 0.87        | 0.192   | 0.983            | 0.99        | 0.883   | 0.9911           |
| GBP3        | Guanylate Binding Protein 3                               | 1.05        | 0.806   | 0.9981           | 1.25        | 0.225   | 0.9752           |
| GCLM        | Glutamate-Cysteine Ligase, Modifier Subunit               | 0.77        | 0.128   | 0.983            | 1.02        | 0.928   | 0.9911           |
| GDF11       | Growth Differentiation Factor 11                          | 0.94        | 0.814   | 0.9981           | 1.11        | 0.555   | 0.9752           |
| GPX3        | Glutathione Peroxidase 3                                  | 0.87        | 0.318   | 0.9505           | 1.11        | 0.419   | 0.9752           |
| HABP2       | Hyaluronan Binding Protein 2                              | 0.69        | 0.251   | 0.9505           | 8.55        | 0.218   | 0.9752           |

|        |                                                                                  |      |       |        |      |       |        |
|--------|----------------------------------------------------------------------------------|------|-------|--------|------|-------|--------|
| HAPLN1 | Hyaluronan And Proteoglycan Link Protein 1                                       | 0.99 | 0.937 | 0.9981 | 0.93 | 0.917 | 0.9911 |
| HERC5  | HECT And RLD Domain Containing E3 Ubiquitin Protein Ligase 5                     | 0.67 | 0.009 | 0.9505 | 0.91 | 0.647 | 0.9752 |
| HMOX1  | Haem Oxygenase 1                                                                 | 1.34 | 0.339 | 0.983  | 1.15 | 0.658 | 0.9752 |
| HSPG2  | Heparan Sulfate Proteoglycan 2                                                   | 1.08 | 0.526 | 0.983  | 1.06 | 0.710 | 0.9881 |
| HTRA1  | HtrA Serine Peptidase 1                                                          | 0.93 | 0.599 | 0.983  | 0.97 | 0.968 | 0.9911 |
| ICAM1  | Intercellular Adhesion Molecule 1                                                | 0.99 | 0.967 | 0.9981 | 0.90 | 0.566 | 0.9752 |
| IFI27  | Interferon, Alpha-Inducible Protein 27                                           | 0.96 | 0.901 | 0.983  | 0.84 | 0.401 | 0.9752 |
| IFI44  | Interferon-Induced Protein 44                                                    | 1.01 | 0.977 | 0.9981 | 0.83 | 0.317 | 0.9752 |
| IFI44L | Interferon-Induced Protein 44-Like                                               | 0.91 | 0.758 | 0.9831 | 0.74 | 0.139 | 0.9752 |
| IFI6   | Interferon, Alpha-Inducible Protein 6                                            | 0.81 | 0.244 | 0.983  | 0.89 | 0.632 | 0.9752 |
| IFI6   | Interferon, Alpha-Inducible Protein 6                                            | 0.90 | 0.564 | 0.983  | 0.85 | 0.474 | 0.9752 |
| IFIT2  | Interferon-Induced Protein With Tetratricopeptide Repeats 2                      | 1.20 | 0.421 | 0.983  | 0.84 | 0.108 | 0.9752 |
| IGFBP4 | Insulin-Like Growth Factor Binding Protein 4                                     | 1.61 | 0.029 | 0.9287 | 1.41 | 0.385 | 0.9752 |
| IL15RA | Interleukin 15 Receptor, Alpha                                                   | 0.98 | 0.909 | 0.9981 | 1.25 | 0.210 | 0.9752 |
| IL1A   | Interleukin 1, Alpha                                                             | 1.67 | 0.117 | 0.983  | 0.85 | 0.515 | 0.9752 |
| IL1B   | Interleukin 1, Beta                                                              | 3.48 | 0.014 | 0.6507 | 0.85 | 0.451 | 0.9752 |
| IL36G  | Interleukin 36, Gamma                                                            | 0.63 | 0.421 | 0.983  | 1.06 | 0.940 | 0.9911 |
| IL6    | Interleukin 6                                                                    | 1.67 | 0.400 | 0.983  | 0.88 | 0.570 | 0.9752 |
| IL8    | Interleukin 8                                                                    | 0.97 | 0.948 | 0.9981 | 0.51 | 0.101 | 0.9752 |
| IRF1   | Interferon Regulatory Factor 1                                                   | 0.88 | 0.499 | 0.983  | 0.93 | 0.555 | 0.9752 |
| IRX3   | Iroquois Homeobox 3                                                              | 1.43 | 0.303 | 0.983  | 1.51 | 0.055 | 0.9752 |
| ITGBL1 | Integrin, Beta-Like 1 (With EGF-Like Repeat Domains)                             | 0.97 | 0.893 | 0.9981 | 0.70 | 0.567 | 0.9752 |
| ITIH3  | Inter-Alpha-Trypsin Inhibitor Heavy Chain 3                                      | 0.76 | 0.613 | 0.983  | 0.58 | 0.253 | 0.9752 |
| LCN2   | Lipocalin 2                                                                      | 2.87 | 0.335 | 0.983  | 0.45 | 0.317 | 0.9752 |
| LRP8   | Low Density Lipoprotein Receptor-Related Protein 8,<br>Apolipoprotein E Receptor | 0.95 | 0.635 | 0.9831 | 0.99 | 0.981 | 0.9911 |
| LUM    | Lumican                                                                          | 0.78 | 0.049 | 0.983  | 1.00 | 0.991 | 0.9911 |
| MARCKS | Myristoylated Alanine-Rich Protein Kinase C Substrate                            | 1.23 | 0.531 | 0.983  | 1.01 | 0.953 | 0.9911 |
| ME1    | Malic Enzyme 1, NADP(+)-Dependent, Cytosolic                                     | 0.92 | 0.390 | 0.983  | 1.24 | 0.315 | 0.9752 |
| MMP12  | Matrix metalloproteinase 12                                                      | 0.83 | 0.657 | 0.983  | 0.94 | 0.922 | 0.9911 |
| MMP13  | Matrix metalloproteinase 13                                                      | 0.86 | 0.741 | 0.983  | 0.40 | 0.267 | 0.9752 |
| MMP2   | Matrix Metalloproteinase 2                                                       | 0.97 | 0.950 | 0.9981 | 1.07 | 0.740 | 0.9911 |
| MMP3   | Matrix Metalloproteinase 3                                                       | 0.99 | 0.969 | 0.9981 | 0.17 | 0.295 | 0.9752 |

|          |                                                                  |      |       |        |      |       |        |
|----------|------------------------------------------------------------------|------|-------|--------|------|-------|--------|
| NQO1     | NAD(P)H Dehydrogenase, Quinone 1                                 | 1.00 | 0.985 | 0.9981 | 1.10 | 0.764 | 0.9911 |
| OASL     | 2'-5'-Oligoadenylate Synthetase-Like                             | 1.50 | 0.349 | 0.983  | 0.74 | 0.249 | 0.9752 |
| OGN      | Osteoglycin                                                      | 0.84 | 0.185 | 0.983  | 1.03 | 0.951 | 0.9911 |
| PARP14   | Poly (ADP-Ribose) Polymerase Family, Member 14                   | 1.00 | 0.990 | 0.9981 | 0.93 | 0.574 | 0.9752 |
| PENK     | Proenkephalin                                                    | 0.94 | 0.908 | 0.9981 | 1.37 | 0.476 | 0.9752 |
| PIM2     | Pim-2 Proto-Oncogene, Serine/Threonine Kinase                    | 1.05 | 0.707 | 0.9831 | 0.99 | 0.954 | 0.9911 |
| PIR      | Pirin (Iron-Binding Nuclear Protein)                             | 0.97 | 0.841 | 0.9981 | 0.94 | 0.727 | 0.9911 |
| POPDC3   | Popeye Domain Containing 3                                       | 0.82 | 0.146 | 0.983  | 2.66 | 0.177 | 0.9752 |
| PRG4     | Proteoglycan 4                                                   | 0.88 | 0.547 | 0.983  | 1.11 | 0.862 | 0.9911 |
| PTX3     | Pentraxin 3, Long                                                | 1.21 | 0.613 | 0.983  | 1.17 | 0.911 | 0.9911 |
| RPL13A   | Ribosomal Protein L13a                                           | 0.91 | 0.679 | 0.983  | 1.16 | 0.492 | 0.9752 |
| S100A4   | S100 Calcium Binding Protein A4                                  | 1.00 | 0.998 | 0.9981 | 1.16 | 0.508 | 0.9752 |
| SAA4     | Serum Amyloid A4, Constitutive                                   | 3.55 | 0.403 | 0.983  | 0.36 | 0.217 | 0.9752 |
| SELE     | Selectin E                                                       | 1.04 | 0.964 | 0.9981 | 0.37 | 0.110 | 0.9752 |
| SERPIND1 | Serpin Peptidase Inhibitor, Clade D (Heparin Cofactor), Member 1 | 0.78 | 0.204 | 0.983  | 1.13 | 0.855 | 0.9911 |
| SFRP1    | Secreted Frizzled-Related Protein 1                              | 2.64 | 0.061 | 0.9505 | 0.92 | 0.685 | 0.9811 |
| SLC15A3  | Solute Carrier Family 15 (Oligopeptide Transporter), Member 3    | 1.08 | 0.666 | 0.983  | 0.87 | 0.499 | 0.9752 |
| SLC40A1  | Solute Carrier Family 40 (Iron-Regulated Transporter), Member 1  | 0.89 | 0.325 | 0.983  | 1.04 | 0.835 | 0.9911 |
| SOD3     | Superoxide Dismutase 3, Extracellular                            | 1.10 | 0.453 | 0.983  | 0.97 | 0.874 | 0.9911 |
| TGFBI    | Transforming Growth Factor, Beta-Induced, 68kDa                  | 0.80 | 0.424 | 0.9505 | 1.00 | 0.991 | 0.9911 |
| THBS3    | Thrombospondin 3                                                 | 0.87 | 0.318 | 0.983  | 1.15 | 0.589 | 0.9752 |
| THBS4    | Thrombospondin 4                                                 | 0.91 | 0.568 | 0.9981 | 0.96 | 0.925 | 0.9911 |
| TNFAIP6  | Tumor Necrosis Factor, Alpha-Induced Protein 6                   | 0.67 | 0.099 | 0.6507 | 0.71 | 0.551 | 0.9752 |
| TNFRSF4  | Tumor Necrosis Factor Receptor Superfamily, Member 4             | 0.90 | 0.450 | 0.983  | 1.13 | 0.594 | 0.9752 |
| TNFSF10  | Tumor Necrosis Factor (Ligand) Superfamily, Member 10            | 0.95 | 0.701 | 0.9981 | 0.94 | 0.701 | 0.9881 |
| TNFSF11  | Tumor Necrosis Factor (Ligand) Superfamily, Member 11            | 0.85 | 0.429 | 0.983  | 0.52 | 0.416 | 0.9752 |
| TRAF1    | TNF Receptor-Associated Factor 1                                 | 1.09 | 0.597 | 0.983  | 0.91 | 0.507 | 0.9752 |
| TSG-6    | TNF-Stimulated Gene 6 Protein (TNFAIP6)                          | 0.66 | 0.094 | 0.9505 | 0.68 | 0.511 | 0.9752 |
| TXNRD1   | Thioredoxin Reductase 1                                          | 0.86 | 0.099 | 0.9981 | 1.11 | 0.316 | 0.9752 |
| UBD      | Ubiquitin D                                                      | 1.57 | 0.498 | 0.983  | 0.85 | 0.577 | 0.9752 |
| UBE2L6   | Ubiquitin-Conjugating Enzyme E2L 6                               | 1.04 | 0.828 | 0.9981 | 1.01 | 0.954 | 0.9911 |

**Supplementary S4. Gene expression in cartilage and fat tissues.** Gene expression was measured using a custom Taqman Low Density Array (TLDA), analysed using DataAsist Software v3.01 and normalised to ribosomal 18S. Data were adjusted using a false discovery rate of 5%. Gene names and symbols are given with fold change (calculated as high/low glucosinolate) and p-values. Cartilage tissue: Low glucosinolate, n=20, high gluosinolate n=17. Fat tissue: Low glucosinolate, n=13, high gluosinolate n=10.

| Nutrient                | Diet                                     |                                           | p-value |
|-------------------------|------------------------------------------|-------------------------------------------|---------|
|                         | Low glucosinolate<br>(mean $\pm$ 95% CI) | High glucosinolate<br>(mean $\pm$ 95% CI) |         |
| Energy kcal (kcal/d)    | 1805.35 (1600 to 2011)                   | 2128.00 (1856 to 2400)                    | 0.20    |
| Energy kJ (kJ/d)        | 7595.10 (6732 to 8458)                   | 8940.76 (7806 to 10076)                   | 0.20    |
| Protein (g/d)           | 74.52 (66.48 to 82.56)                   | 86.85 (74.75 to 98.95)                    | 0.23    |
| Carbohydrate (g/d)      | 215.85 (187 to 244)                      | 258.71 (225 to 292)                       | 0.20    |
| Sugars (g/d)            | 97.11 (81.74 to 112.50)                  | 117.56 (93.09 to 142)                     | 0.30    |
| Starch (g/d)            | 110.48 (94.37 to 126.60)                 | 133.49 (113.50 to 153.5)                  | 0.23    |
| Total Fat (g/d)         | 69.57 (59.95 to 79.19)                   | 79.19 (63.83 to 94.55)                    | 0.39    |
| Saturates (g/d)         | 25.10 (21 to 29.19)                      | 30.51 (23.34 to 37.68)                    | 0.30    |
| Monounsaturates (g/d)   | 23.95 (20.54 to 27.35)                   | 25.79 (21.01 to 30.58)                    | 0.64    |
| Polyunsaturates (g/d)   | 11.14 (9.42 to 12.86)                    | 11.31 (9.20 to 13.41)                     | 0.94    |
| Fibre AOAC (g)          | 19.19 (17.28 to 21.09)                   | 23.02 (20.02 to 26.01)                    | 0.20    |
| NMES (g/d)              | 49.79 (37.58 to 62.01)                   | 63.06 (36.24 to 89.88)                    | 0.48    |
| Alcohol (g/d)           | 8.85 (2.56 to 15.13)                     | 12.76 (2.56 to 22.96)                     | 0.64    |
| Sodium (mg/d)           | 2720.05 (1982 to 3458)                   | 6486.65 (-548.6 to 13522)                 | 0.37    |
| Potassium (mg/d)        | 3429.95 (2986 to 3874)                   | 4488.41 (3304 to 5673)                    | 0.23    |
| Calcium (mg/d)          | 908.10 (774.5 to 1042)                   | 1063.47 (862.9 to 1264)                   | 0.30    |
| Magnesium (mg)          | 301.00 (263.5 to 338.50)                 | 406.76 (297.8 to 515.7)                   | 0.20    |
| Phosphorus (mg/d)       | 1324.25 (1185 to 1464)                   | 1598.47 (1356 to 1841)                    | 0.20    |
| Iron (mg/d)             | 11.89 (10.29 to 13.49)                   | 14.00 (1.27 to 16.72)                     | 0.30    |
| Copper (mg/d)           | 1.41 (1.07 to 1.75)                      | 2.17 (0.99 to 3.35)                       | 0.30    |
| Zinc (mg/d)             | 8.56 (7.54 to 9.60)                      | 10.96 (8.64 to 13.27)                     | 0.20    |
| Chloride (mg/d)         | 3732.95 (3094 to 4372)                   | 4998.76 (3153 to 6844)                    | 0.30    |
| Manganese (mg/d)        | 3.84 (3.18 to 4.51)                      | 5.30 (4.21 to 6.40)                       | 0.20    |
| Selenium ( $\mu$ g/d)   | 39.85 (34.7 to 45)                       | 42.18 (31.83 to 52.52)                    | 0.78    |
| Iodine ( $\mu$ g/d)     | 152.05 (129 to 175)                      | 195.82 (142.8 to 248.90)                  | 0.25    |
| Retinol ( $\mu$ g/d)    | 510.50 (223.7 to 797.30)                 | 1154.06 (773.1 to 1535)                   | 0.13    |
| Carotene ( $\mu$ g/d)   | 3493.15 (2827 to 4159)                   | 3306.18 (2003 to 4609)                    | 0.87    |
| Vitamin D ( $\mu$ g/d)  | 3.04 (2.32 to 3.80)                      | 3.02 (2.25 to 3.80)                       | 0.98    |
| Vitamin E (mg/d)        | 6.86 (5.44 to 8.27)                      | 7.66 (6.42 to 8.90)                       | 0.55    |
| Thiamin (mg/d)          | 1.64 (1.45 to 1.84)                      | 1.73 (1.51 to 1.96)                       | 0.64    |
| Riboflavin (mg/d)       | 2.01 (1.68 to 2.34)                      | 2.06 (1.70 to 2.43)                       | 0.88    |
| Niacin (mg/d)           | 19.95 (17.03 to 22.88)                   | 20.63 (17.00 to 24.27)                    | 0.87    |
| Potential Niacin (mg/d) | 15.11 (13.43 to 16.80)                   | 17.13 (14.52 to 19.73)                    | 0.30    |
| Vitamin B6 (mg/d)       | 1.91 (1.66 to 2.15)                      | 2.06 $\pm$ 0.66                           | 0.61    |
| Vitamin B12 (mg/d)      | 5.54 (4.50 to 6.58)                      | 6.76 (4.86 to 8.66)                       | 0.37    |
| Folate ( $\mu$ g/d)     | 274.90 (234.7 to 315.1)                  | 328.65 (273.8 to 383.5)                   | 0.25    |



|                                   |                                          |                                           |                 |
|-----------------------------------|------------------------------------------|-------------------------------------------|-----------------|
| Pantothenate (mg/d)               | 5.87 (5.00 to 6.74)                      | 5.91 (4.96 to 6.87)                       | 0.97            |
| Biotin ( $\mu\text{g}/\text{d}$ ) | 41.27 (32.90 to 49.64)                   | 59.42 (38.02, 80.82)                      | 0.24            |
| Vitamin C (mg/d)                  | 92.85 (74.67 to 111)                     | 196.88 (166.2, 227.6)                     | <i>9.96E-06</i> |
| Nutrient                          | Low glucosinolate<br>(mean $\pm$ 95% CI) | High glucosinolate<br>(mean $\pm$ 95% CI) | p-value         |

**Supplementary S5. Self-reported nutritional intakes.** Patients recorded their nutritional intakes for 7 days during intervention. Mean intakes  $\pm$  95% confidence intervals are shown with adjusted p-values for 1% false discovery rate. Low glucosinolate n=20, high glucosinolate n=17. Significance level was  $p < 0.05$ .

| Copy number  | Low glucosinolate<br>n, (%) | High glucosinolate<br>n, (%) | Total<br>n, (%) |
|--------------|-----------------------------|------------------------------|-----------------|
| <i>GSTT1</i> |                             |                              |                 |
| 0            | 2 (5.4)                     | 1 (2.7)                      | 3 (8.1)         |
| 1            | 0 (0)                       | 0 (0)                        | 0 (0)           |
| 2            | 14 (35.1)                   | 13 (37.8)                    | 27 (73)         |
| 3            | 0 (0)                       | 0 (0)                        | 0 (0)           |
| 4            | 4 (10.8)                    | 3 (8.1)                      | 7 (18.9)        |
| <i>GSTM1</i> |                             |                              |                 |
| 0            | 7 (18.9)                    | 10 (27.0)                    | 17 (45.9)       |
| 1            | 0 (0)                       | 0 (0)                        | 0 (0)           |
| 2            | 11 (29.7)                   | 7 (18.9)                     | 18 (48.6)       |
| 3            | 0 (0)                       | 0 (0)                        | 0 (0)           |
| 4            | 2 (5.4)                     | 0 (0)                        | 2 (5.4)         |
| <i>GSTP1</i> |                             |                              |                 |
| 0            | 0 (0)                       | 0 (0)                        | 0 (0)           |
| 1            | 0 (0)                       | 0 (0)                        | 0 (0)           |
| 2            | 10 (27.0)                   | 8 (21.6)                     | 18 (48.6)       |
| 3            | 3 (8.1)                     | 5 (13.5)                     | 7 (21.6)        |
| 4            | 6 (16.2)                    | 4 (10.8)                     | 10 (27)         |
| 5            | 1 (2.7)                     | 0 (0)                        | 1 (2.7)         |

**Supplementary S6. Predicted GST copy numbers.** Genomic DNA was extracted from plasma and the copy numbers were predicted for glutathione S-transferase variants P1, M1 and T1 (GSTP1, GSTM1, GSTT1). Taqman® Copy Number Assays (Life Technologies) were used and the copy numbers were predicted using Copy Caller® software (Life Technologies). Low glucosinolate n=20, high glucosinolate n=17.
